1 **Title:** Neuroanatomical Norms in the UK Biobank: The Impact of Allometric Scaling, Sex and  
2 Age.

3 **Running title:** Neuroanatomical Norms in the UK Biobank

4 **Authors:** Camille Michèle Williams<sup>1\*</sup>, Hugo Peyre<sup>1,2,3</sup>, Roberto Toro<sup>4,5,6</sup>, & Franck Ramus<sup>1</sup>.

5 1. Laboratoire de Sciences Cognitives et Psycholinguistique, Département d'Etudes  
6 Cognitives, École Normale Supérieure, EHESS, CNRS, PSL University, 75005, Paris,  
7 France

8 2. INSERM UMR 1141, Paris Diderot University, Paris, France.

9 3. Department of Child and Adolescent Psychiatry, Robert Debré Hospital, APHP, Paris,  
10 France.

11 4. Human Genetics and Cognitive Functions, Institut Pasteur, UMR 3571 CNRS

12 5. Center for Research and Interdisciplinarity (CRI), INSERM U1284

13 6. Université de Paris, Paris, France.

14 \*CORRESPONDING AUTHOR: Camille Michèle Williams, LSCP, Département d'Etudes  
15 Cognitives, École Normale Supérieure, 29 rue d'Ulm, 75005 Paris, France. Email:  
16 williams.m.camille@gmail.com.

17

## 18 **Table of Contents**

|    |                                                                       |           |
|----|-----------------------------------------------------------------------|-----------|
| 19 | <b>Abstract .....</b>                                                 | <b>4</b>  |
| 20 | <b>1. Introduction .....</b>                                          | <b>7</b>  |
| 21 | <b>2. Methods .....</b>                                               | <b>9</b>  |
| 22 | <b>2.1. Participants .....</b>                                        | <b>9</b>  |
| 23 | 2.1.1. Brain Image Acquisition and Processing. ....                   | 9         |
| 24 | 2.1.2. Total Brain Volume (TBV) .....                                 | 9         |
| 25 | 2.1.3. Scanner Site .....                                             | 9         |
| 26 | 2.1.4. Sex .....                                                      | 10        |
| 27 | 2.1.5. Age .....                                                      | 10        |
| 28 | <b>2.2. Image Derived-Phenotypes (IDPs).....</b>                      | <b>10</b> |
| 29 | 2.2.1. Global IDPs .....                                              | 10        |
| 30 | 2.2.2. Regional IDPs.....                                             | 11        |
| 31 | <b>2.3. Statistical Analyses.....</b>                                 | <b>11</b> |
| 32 | 2.3.1 Data Transformation.....                                        | 12        |
| 33 | 2.3.2. Analyses. ....                                                 | 12        |
| 34 | 2.3.3. Global Analyses.....                                           | 12        |
| 35 | 2.3.4 Regional Analyses. ....                                         | 13        |
| 36 | 2.3.5 Person-level Neuroanatomical Markers. ....                      | 13        |
| 37 | 2.3.6 Person-level Global Neuroanatomical Deviance.....               | 13        |
| 38 | 2.3.7 Exploratory Analyses. ....                                      | 14        |
| 39 | 2.3.8 Multiple Comparison Corrections. ....                           | 14        |
| 40 | <b>3. Results and Discussion.....</b>                                 | <b>16</b> |
| 41 | <b>3.1 Allometry .....</b>                                            | <b>16</b> |
| 42 | 3.1.1 Global Allometry .....                                          | 16        |
| 43 | 3.1.2 Cortical Allometry.....                                         | 17        |
| 44 | 3.1.3 Subcortical Allometry .....                                     | 19        |
| 45 | 3.1.4 Mean Thickness and Surface Area Scaling with TBV .....          | 19        |
| 46 | 3.1.5 Sex or Age-Dependent Allometry .....                            | 20        |
| 47 | 3.1.6 Conclusion on Allometry .....                                   | 20        |
| 48 | <b>3.2 Sex differences.....</b>                                       | <b>22</b> |
| 49 | 3.2.1 Global Measures .....                                           | 22        |
| 50 | 3.2.2. Total Cerebellar GMV .....                                     | 22        |
| 51 | 3.2.3 Regional Cerebellar GMV .....                                   | 22        |
| 52 | 3.2.4 Whole Subcortical Volumes.....                                  | 23        |
| 53 | 3.2.5 Subcortical Subsegmentations.....                               | 24        |
| 54 | 3.2.6 Cortical Regions .....                                          | 25        |
| 55 | 3.2.7 Sex differences in variance.....                                | 28        |
| 56 | 3.2.8 Conclusion on sex differences.....                              | 30        |
| 57 | <b>3.3 Age Effects .....</b>                                          | <b>30</b> |
| 58 | 3.3.1 Global Measures .....                                           | 30        |
| 59 | 3.3.2 Cerebellar Volumes .....                                        | 31        |
| 60 | 3.3.3 Whole Subcortical and Subcortical Subsegmentation Volumes ..... | 31        |
| 61 | 3.3.4 Cortical regions .....                                          | 32        |
| 62 | 3.3.5 Conclusion of Age Effects.....                                  | 35        |

Abbreviations: Total Cerebral Measures (TCMs): Total Brain Volume (TBV), Total Mean Cortical Thickness (MCT), or Total Surface Area (TSA). Grey Matter Volume (GMV). White Matter Volume (WMV). 2

|    |                                                                   |           |
|----|-------------------------------------------------------------------|-----------|
| 63 | <b>3.4. Does Brain Allometry Influence Reported Results?.....</b> | <b>35</b> |
| 64 | <b>3.5 Neuroanatomical Norms .....</b>                            | <b>36</b> |
| 65 | <b>3.6 Limitations.....</b>                                       | <b>41</b> |
| 66 | <b>4. Conclusion.....</b>                                         | <b>42</b> |
| 67 | <b>5. References .....</b>                                        | <b>43</b> |
| 68 |                                                                   |           |
| 69 |                                                                   |           |
| 70 |                                                                   |           |

71 **Abstract**

72 Few neuroimaging studies are sufficiently large to adequately describe population-wide  
73 variations. This study's primary aim was to generate neuroanatomical norms and individual  
74 markers that consider age, sex, and brain size, from 629 cerebral measures in the UK Biobank (N  
75 = 40 028). The secondary aim was to examine the effects and interactions of sex, age, and brain  
76 allometry – the non-linear scaling relationship between a region and brain size (e.g., Total Brain  
77 Volume) across cerebral measures.

78 Allometry was a common property of brain volumes, thicknesses, and surface areas (83%)  
79 and was largely stable across age and sex. Sex differences occurred in 67% of cerebral measures  
80 (median  $|\beta| = 0.13$ ): 37% of regions were larger in males and 30% in females. Brain measures  
81 (49%) generally decreased with age, although aging effects varied across regions and sexes. While  
82 models with an allometric or linear covariate adjustment for brain size yielded similar significant  
83 effects, omitting brain allometry influenced reported sex differences in variance.

84 This large scale-study advances our understanding of age, sex, and brain allometry's  
85 impact on brain structure and provides data for future UK Biobank studies to identify the cerebral  
86 regions that covary with specific phenotypes, independently of sex, age, and brain size.

87

88

89

Word count: 200

90

91

92

93

94

95

96

97 **Graphical Abstract**

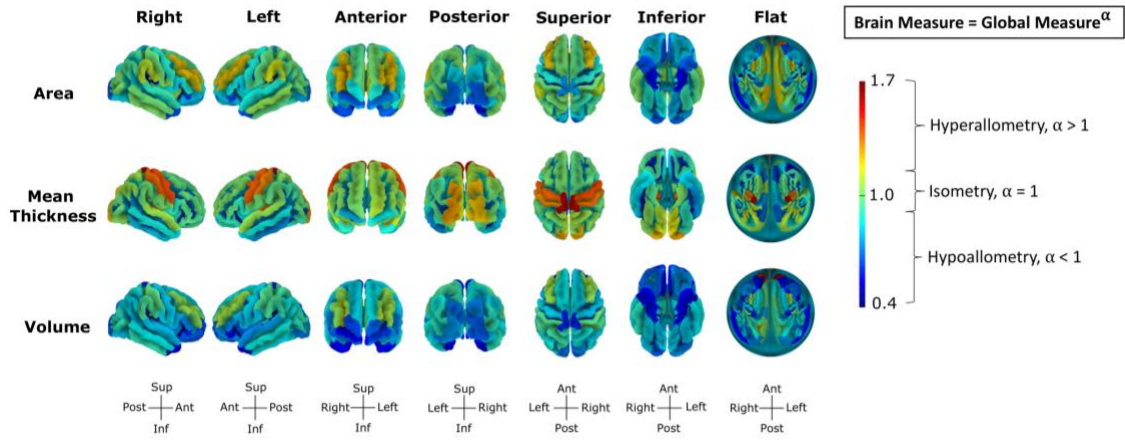

98

99

## 100 **Keywords**

101 Cerebral Norms, Brain Volumes, Cortical Thickness, Cortical Surface Area, Allometry, Sex  
102 Differences

## 103 **Highlights**

- 104 • We created neuroanatomical norms and individual markers for the UK Biobank (N=40  
105 028)
- 106 • Allometry was common across 83% of brain volumes, thicknesses, and surface areas
- 107 • 67% of regions differed between sexes: 37% were larger in males and 30% in females
- 108 • Omitting brain allometry influenced reported sex differences in variance
- 109 • 49% of regions declined with age, with variations across regions and sexes

110

## 111 **Acknowledgements**

112 This work received support under the program “Investissements d’Avenir” launched by the French  
113 Government and implemented by ANR with the references ANR-17-EURE-0017 and ANR-10-  
114 IDEX-0001-02 PSL. Funding was also obtained from Fondation pour l’Audition (FPA RD-2016-  
115 8 research grant). This research has been conducted using the UK Biobank Resource. Declarations  
116 of interest: none.

117

## 118 **Conflict of interest**

119 On behalf of all authors, the corresponding author states that there is no conflict of interest.

120

## 121 **Data/Code Availability**

122 This research has been conducted using data from UK Biobank, a major biomedical database  
123 (<http://www.ukbiobank.ac.uk/>). Restrictions apply to the availability of these data, which were  
124 used under license for this study: application 46007. Preregistration and code are available on OSF:  
125 [https://osf.io/s4qc5/?view\\_only=bb067d96d0df4ae4902f99747d60e828](https://osf.io/s4qc5/?view_only=bb067d96d0df4ae4902f99747d60e828).

126

## 127 **1. Introduction**

128 Although all humans share a common brain structure and organization, they also vary in  
129 terms of the size and shape of their brain and its subcomponents. These neuroanatomical variations  
130 are thought to partly underlie differences in cognitive and behavioral traits and in the risk of  
131 developing psychiatric and neurological disorders (for review Dallaire-Théroux et al., 2017;  
132 Deary, 2010; Jumah et al., 2016; Oakes et al., 2017; Schmidt et al., 2018). Yet, most of these  
133 studies rely on relatively small samples and suffer from high sampling variability. When the  
134 sample is too small to accurately represent the control or target population, spurious  
135 neuroanatomical markers may be reported. Moreover, if true effects are observed in small samples,  
136 their size would be exaggerated as only large effects would pass a conventional statistical  
137 significance threshold (e.g.,  $p < 0.05$ ) with few degrees of freedom (for review Szucs & Ioannidis,  
138 2017, 2020). Thus, despite hundreds of studies, few neuroanatomical measures can be declared as  
139 robust markers of cognitive traits or psychiatric and neurological disorders (Gong et al., 2019;  
140 Marek et al., 2020; Matsuo et al., 2019; Peyre et al., 2020; Ramus et al., 2018; Williams et al.,  
141 2020).

142 An alternative approach to comparing clinical and healthy groups would be to compare  
143 clinical groups with population norms, as is done with well-established cognitive dimensions, such  
144 as general intelligence, personality, and psychopathology scales (Beck et al., 1996; Costa Jr. &  
145 McCrae, 2008; Wechsler et al., 2008). If neuroanatomical norms for a population were available,  
146 then comparing any clinical group to these norms would overcome the issue of sampling variability  
147 in the control group. However, neuroanatomical norms are not easy to establish, as they require  
148 large populations, and neuroanatomical measures often depend on MRI scanner characteristics and  
149 acquisition sequences. Valid norms would therefore only be established within a given study in a  
150 single scanner, or in a small set of comparable scanning sites with similar acquisition protocols as  
151 done by the UK Biobank.

152 For this reason, the UK Biobank, the largest neuroimaging dataset available to date ( $N \sim$   
153 40 000), is an ideal candidate to create neuroanatomical norms that could be re-used for multiple  
154 studies of neurological and psychiatric disorders. These norms should be sex-specific, given that  
155 the two sexes differ on a number of neuroanatomical brain measures (Kaczurkin et al., 2019;  
156 Lotze et al., 2019; Ritchie et al., 2018; Ruigrok et al., 2014; Sanchis-Segura et al., 2019), and have  
157 different risks of developing certain neurological and psychiatric disorders (Beam et al., 2018;

Abbreviations: Total Cerebral Measures (TCMs): Total Brain Volume (TBV), Total Mean 7  
Cortical Thickness (MCT), or Total Surface Area (TSA). Grey Matter Volume (GMV).  
White Matter Volume (WMV).

158 Boyd et al., 2015; Seedat et al., 2009). And age should also be considered, as it is associated with  
159 variations in neuroanatomical measures (Fjell et al., 2013; Hurtz et al., 2014; Narvacan et al., 2017;  
160 Vinke et al., 2018; Wierenga et al., 2014), cognitive function (Simon R. Cox et al., 2018; S.R. Cox  
161 et al., 2019), and disease risk (Fiske et al., 2009; Fjell et al., 2009; Jellinger & Attems, 2015).

162 Finally, global brain measures should be taken into account to create norms that are  
163 independent of variations in brain size. Although there is mounting evidence that brain allometry  
164 - the non-linear scaling relationship between regional and global brain dimensions - is an inherent  
165 property of the brain (Finlay et al., 2001; Jäncke et al., 2015a; Liu et al., 2014; Mankiw et al.,  
166 2017; Reardon et al., 2018; Toro et al., 2009; Williams et al., 2020), standard modes of adjustment  
167 for individual differences in global measures, such as the proportion method, or linear covariate  
168 adjustment, omit brain allometry. To this day, numerous studies have shown that different methods  
169 of adjustment for brain size contribute to the variability of reported volumetric group differences  
170 (Lefebvre et al., 2015; O'Brien et al., 2006, 2011; Reardon et al., 2016; Sanchis-Segura et al.,  
171 2019) and some specifically suggest that omitting brain allometry leads to spurious group  
172 differences (Mankiw et al., 2017; Reardon et al., 2016; Williams et al., 2020). Since  
173 regional/global relationships follow a power function in a majority of regions, it is recommended  
174 to log-transform regional and Total Cerebral Measures (TCMs; i.e., Total Brain Volume (TBV),  
175 Total Mean Cortical Thickness (MCT), or Total Surface Area (TSA)) to account for allometric  
176 scaling and obtain a more accurate description of the relationship between brain regions and  
177 TCMs.

178 Thus, the present study's first aim is to produced neuroanatomical norms in the UK  
179 Biobank that take into account sex, age, and the allometric relationships between regional and  
180 global brain measures. Our second goal is to investigate the extent to which neuroanatomical  
181 variations depend on sex, age (linear and quadratic), and brain allometry effects and their  
182 interactions. Finally, our third aim is to compare TCM adjustment techniques to examine whether  
183 omitting brain allometry systematically biases reported results. By generating neuroanatomical  
184 markers across volumes, mean thicknesses, and surface areas available in the UK Biobank, the  
185 present paper provides UK population norms for future studies that aim to link regional  
186 neuroanatomical markers to specific cognitive and behavioral traits or neurological and psychiatric  
187 disorders.

188



## 189 2. Methods

### 190 2.1. Participants

191 Participants were drawn from the UK Biobank, an open-access large prospective study with  
192 phenotypic, genotypic, and neuroimaging data from 500 000 participants recruited between 2006  
193 and 2011 at 40 to 69 years old in Great Britain (Sudlow et al., 2015). All participants provided  
194 informed consent (“Resources tab” at <https://biobank.ctsu.ox.ac.uk/crystal/field.cgi?id=200>). The  
195 UK Biobank received ethical approval from the Research Ethics Committee (reference  
196 11/NW/0382) and the present study was conducted based on application 46 007.

197 Currently, Magnetic Resonance Imaging (MRI) data and Imaging-Derived Phenotypes (IDPs)  
198 are available for about 41 000 participants. This study analyzed the IDPs from the first imaging  
199 visit generated by an image-processing pipeline developed and run by the UK Biobank Imaging  
200 team (Alfaro-Almagro et al., 2018; Miller et al., 2016).

#### 201 2.1.1. Brain Image Acquisition and Processing.

202 A standard Siemens Skyra 3T running VD13A SP4 with a standard Siemens 32-channel RF  
203 receive head coil was used to collect data (Brain Scan Protocol). The 3D MPRAGE T1-weighted  
204 volumes were analyzed by the UK Biobank Imaging team with pipeline scripts that primarily call  
205 for FSL and Freesurfer tools. Details of the acquisition protocols, image processing pipeline, image  
206 data files and derived measures IDPs of brain structure and function are available in the UK  
207 Biobank Imaging Protocols.

#### 208 2.1.2. Total Brain Volume (TBV)

209 TBV was calculated as the sum of the total grey matter volume (GMV; i.e., sum of cortical  
210 and subcortical GMV, data-field 26518), cerebellum white matter volume (WMV, data-fields  
211 26556 for left and 26587 for right), and cerebral WMV (data-fields 26553 for left and 26584 for  
212 right) from the UK Biobank ASEG Freesurfer segmentations. Refer to Supplemental Info 1 for  
213 more on the choice of TBV. Individuals with missing data for these regions were excluded from  
214 the analyses, yielding 40 055 participants.

#### 215 2.1.3. Scanner Site

216 The age and sex of participants differed across the 3 scanner sites located in Cheadle  
217 (Site 11025), Reading (Site 11026), and Newcastle (Site 11027; See Supplemental Info 1). One  
218 individual without scanner site was removed from the analyses yielding 40 054 participants.

Abbreviations: Total Cerebral Measures (TCMs): Total Brain Volume (TBV), Total Mean 9  
Cortical Thickness (MCT), or Total Surface Area (TSA). Grey Matter Volume (GMV).  
White Matter Volume (WMV).

#### 219 2.1.4. Sex

220 Participants who did not self-report as male or female or whose self-reported sex and genetic  
221 sex differed were also excluded from the analyses ( $N = 26$ ). When genetic sex was not available,  
222 reported-sex was used to define the sex of the participant. Of the 40 029 participants included in  
223 the analyses, there were more females ( $N = 21\ 142$ ) than males ( $N = 18\ 886$ ,  $\chi^2(1) = 127.15$ ,  $p <$   
224  $2.2e-16$ ).

#### 225 2.1.5. Age

226 To obtain a continuous and more precise measure of age, age was calculated based on the year  
227 and month of birth of the participant and the day, month, and year of their MRI visit. Mean age  
228 was at 63.70 years old ( $SD = 7.54$ ). Males ( $M = 64.39$  years,  $SD = 7.65$ ) were older than females  
229 ( $t_{(39180)} = -17.18$ ,  $p < 2.2e-16$ ,  $M = 63.09$  years,  $SD = 7.39$ ).

### 230 2.2. Image Derived-Phenotypes (IDPs)

231 The descriptive statistics of all global and regional IDPs analyzed in the present study and their  
232 respective data-fields and segmentation origin are listed in Supplemental Table A1. The majority  
233 of IDPs correspond to grey matter, since white matter volumes were not segmented by the UK  
234 Biobank Imaging team.

#### 235 2.2.1. Global IDPs

236 A total of 9 global IDPs were investigated: TBV, Total Mean Cortical Thickness (Total MCT),  
237 Total Surface Area (TSA), Subcortical GMV, Cortical GMV, Cerebral WMV, Cerebellar GMV,  
238 Cerebellar WMV, and the Brainstem volume.

239 WMV measures were obtained by summing left and right global measures from Freesurfer  
240 ASEG segmentations (data-field [190](#)). Cerebellum GMV was calculated as the sum of the  
241 cerebellar volumes from the FAST segmentations (data-field [1101](#)). Total MCT and TSA were  
242 respectively calculated as the sum of the mean cortical thickness and surface area measures from  
243 the Freesurfer a2009s segmentations (data-field [197](#)). The whole brain stem measure was taken  
244 from the Freesurfer subsegmentations (data-field [191](#)) and the Subcortical GMV measure was  
245 calculated as the sum of the left and right whole amygdala, hippocampus, and thalamus volumes  
246 from the Freesurfer subsegmentations (data-field [191](#)) and the left and right caudate, accumbens,  
247 pallidum, and putamen of the Freesurfer ASEG segmentations (data-field [190](#)).

248 Based on the recommendations from the [UK Biobank Imaging Protocols](#), we excluded  
249 Freesurfer IDPs when T2-FLAIR was not used in addition to the T1 images to obtain the  
Abbreviations: Total Cerebral Measures (TCMs): Total Brain Volume (TBV), Total Mean 10  
Cortical Thickness (MCT), or Total Surface Area (TSA). Grey Matter Volume (GMV).  
White Matter Volume (WMV).

250 segmentations from Freesurfer a2009s (volume, surface area, and mean thickness) and Freesurfer  
251 subsegmentations. Moreover, 790 individuals had missing values for all FAST cerebellum  
252 segmentations and were excluded from the FAST segmentation analyses.

253 Thus, while 40 028 individuals were included in the analyses for TBV, Cerebellum WM, and  
254 Cerebral WM, 39 238 individuals were included in the analyses with FAST segmentations and 38  
255 710 were included in the analyses of the Freesurfer Subsegmentations and Freesurfer a2009s  
256 segmentations. Missing values and null segmentations (e.g., 0 mm<sup>3</sup>) for a region were replaced by  
257 the mean of that region when calculating global measures. See Supplemental Info 3 for correlations  
258 between the global measures provided by Freesurfer ASEG and those calculated from the FAST,  
259 Freesurfer Subsegmentations, Freesurfer ASEG, and Freesurfer a2009s Segmentations.

### 260 2.2.2. Regional IDPs

261 A case-wise participant exclusion strategy was applied to each IDP for the regional  
262 analyses: participants with a missing value or a segmentation error for a region were excluded  
263 from the analyses of that region but were maintained in the analyses of other IDP. Following visual  
264 examination of the distribution of regional cerebral measures, values 3 times the inter-quartile  
265 range for a region were considered to be segmentation errors and were removed from the analyses  
266 of that region.

267 A total of 620 regional IDPs were investigated: 444 cortical regions (148 volumes, 148  
268 surface areas, and 148 cortical thicknesses) from the Freesurfer a2009s segmentations (Destrieux  
269 Atlas, data-field [197](#)), 116 whole segmentations and subsegmentations of the amygdala,  
270 hippocampus, and thalamus and subsegmentations of the brainstem (Freesurfer subsegmentations,  
271 data-field [191](#)), 28 cerebellum GMV segmentations from the FAST segmentations (data-field  
272 [1101](#)), and 32 subcortical, white matter, and ventricle volumes from the Freesurfer ASEG  
273 segmentations (data-field [190](#)). Freesurfer subcortical segmentations for the caudate, putamen,  
274 accumbens, and pallidum were used instead of the preregistered FIRST volumes, for segmentation  
275 consistency with the other subcortical and cortical volume which were segmented from  
276 Freesurfer.

### 277 2.3. Statistical Analyses

278 Analyses were preregistered on OSF and run using R (R Core Team, 2019). The preregistration  
279 and code are on OSF ([https://osf.io/s4qc5/?view\\_only=bb067d96d0df4ae4902f99747d60e828](https://osf.io/s4qc5/?view_only=bb067d96d0df4ae4902f99747d60e828)).  
280 Used packages are listed in Supplemental Info 7.

Abbreviations: Total Cerebral Measures (TCMs): Total Brain Volume (TBV), Total Mean Cortical Thickness (MCT), or Total Surface Area (TSA). Grey Matter Volume (GMV). White Matter Volume (WMV). 11

281

### 282 2.3.1 Data Transformation.

283 To examine allometric scaling, regional and global measures were log<sub>10</sub> transformed. All  
284 continuous variables were centered around the mean in order to examine the effects of a variable  
285 when other variables are at their mean value. The categorical sex variable was coded -0.5 for males  
286 and 0.5 for females. The scanner site variable was dummy coded with the largest site, Cheadle (Site  
287 1102), as reference.

### 288 2.3.2. Analyses.

289 Global and Regional analyses were performed twice. Once without scaling (dividing by 1  
290 SD) to obtain the allometric scaling coefficient for each brain region and once with scaling to  
291 report standardized betas as effect sizes. Non-linear effects of age were modeled with quadratic  
292 age over spline regression as spline regressions do not yield interpretable beta coefficients of age.  
293 Isometry was tested using the linear hypothesis function which tests if scaling coefficients obtained  
294 without scaling variables differ from 1. Scanner site (Cheadle - Site 1102, Reading - Site 11026,  
295 and Newcastle - Site 11027) was additionally added as a covariate, although it was omitted from  
296 the preregistration.

### 297 2.3.3. Global Analyses.

298 Global analyses were conducted to evaluate how TBV varies with age, age<sup>2</sup>, and sex  
299 (equation 1) and how TSA, Total MCT, Cerebral GMV, Cerebral WMV, Total Subcortical GMV,  
300 Cerebellum GMV, Cerebellum WMV, and the brainstem volume vary with TBV, age, age<sup>2</sup>, and  
301 sex (equation 2).

302

303 Equation 1

$$304 \text{Log}_{10}(TBV) = \text{Intercept} + \beta_1 * \text{Age} + \beta_2 * \text{Sex} + \beta_3 * \text{Age}^2 + \beta_4 * \text{Age} \times \text{Sex} + \beta_5 * \text{Age}^2 \times \text{Sex} + \beta_6 * \\ 305 \text{Scanner Site} + \text{Error}$$

306 Equation 2

$$307 \text{Log}_{10}(\text{Global Measure}) = \text{Intercept} + \beta_1 * \text{Log}_{10}(TBV) + \beta_2 * \text{Age} + \beta_3 * \text{Sex} + \beta_4 * \text{Age}^2 + \\ 308 \beta_5 * \text{Log}_{10}(TBV) \times \text{Sex} + \beta_6 * \text{Log}_{10}(TBV) \times \text{Age} + \beta_7 * \text{Log}_{10}(TBV) \times \text{Age}^2 + \beta_8 * \text{Age} \times \text{Sex} + \\ 309 \beta_9 * \text{Age}^2 \times \text{Sex} + \beta_{10} * \text{Log}_{10}(TBV) \times \text{Age} \times \text{Sex} + \beta_{11} * \text{Log}_{10}(TBV) \times \text{Age}^2 \times \text{Sex} + \beta_{12} * \text{Scanner Site} \\ 310 + \text{Error}$$

311

Abbreviations: Total Cerebral Measures (TCMs): Total Brain Volume (TBV), Total Mean Cortical Thickness (MCT), or Total Surface Area (TSA). Grey Matter Volume (GMV). White Matter Volume (WMV). 12

### 312 2.3.4 Regional Analyses.

313 Regional analyses were conducted to evaluate how regional volumes, surface areas, and  
314 cortical thicknesses vary with TCM, age, age<sup>2</sup>, and sex with equation 3. The TCMs were TBV for  
315 volumes, total MCT for mean thicknesses, and TSA for surface areas.

316

317 Equation 3

$$\begin{aligned} 318 \text{Log10}(\text{Region}) = & \text{Intercept} + \beta_1 * \text{Log10}(\text{TCM}) + \beta_2 * \text{Age} + \beta_3 * \text{Sex} + \beta_4 * \text{Age}^2 + \beta_5 * \text{Log10}(\text{TCM}) \times \\ 319 & \text{Sex} + \beta_6 * \text{Log10}(\text{TCM}) \times \text{Age} + \beta_7 * \text{Log10}(\text{TCM}) \times \text{Age}^2 + \beta_8 * \text{Age} \times \text{Sex} + \beta_9 * \text{Age}^2 \times \text{Sex} + \\ 320 & \beta_{10} * \text{Log10}(\text{TCM}) \times \text{Age} \times \text{Sex} + \beta_{11} * \text{Log10}(\text{TCM}) \times \text{Age}^2 \times \text{Sex} + \beta_{12} * \text{Scanner Site} + \text{Error} \end{aligned}$$

321

### 322 2.3.5 Person-level Neuroanatomical Markers.

323 To obtain a global and regional marker of an individual's deviance from the norm in terms  
324 of volume, mean thickness, and surface area, we extracted the residuals from each dependent  
325 variable. The residuals were obtained from the model where continuous variables were centered  
326 but not scaled to maintain differences in magnitude across regions. An individual's residual value  
327 for a given regional measure reflects that individual's deviance from the norm, given his/her age,  
328 sex, and TCM, and therefore constitutes a new neuroanatomical marker.

329

### 330 2.3.6 Person-level Global Neuroanatomical Deviance.

331 From the person-level local neuroanatomical markers, we generated four person-level  
332 global neuroanatomical deviance measures with equation 4: one for volumes, one for mean  
333 thicknesses, one for surface areas, and one for all regions. The person-level global neuroanatomical  
334 deviance measure corresponds to a person's global neuroanatomical deviance from the norm.  
335 Although we pre-registered equation 4 without dividing by the total number of investigated regions  
336 for a global measure (N), we did so to obtain a value reflecting mean deviation relative to the norm.  
337 Considering that all IDPs were not available for all individuals, we excluded participants with  
338 more than 10% of missing data across regional IDPs. The cerebral marker across brain measures,  
339 which was not preregistered, was calculated by averaging the Z-score of the volumetric, cortical  
340 mean thickness, and cortical surface area global neuroanatomical deviance marker.

341

342 Equation 4

Abbreviations: Total Cerebral Measures (TCMs): Total Brain Volume (TBV), Total Mean Cortical Thickness (MCT), or Total Surface Area (TSA). Grey Matter Volume (GMV). White Matter Volume (WMV). 13

343 Global Neuroanatomical Deviance=  $(\sum (\text{Person-Level Neuroanatomical Markers})^2) / N$

344

### 345 2.3.7 Exploratory Analyses.

346 These analyses were not preregistered unless otherwise stated (for more details see  
347 Supplemental Info 4). In brief, we first examined whether global and regional measures were  
348 allometric with the linearHypothesis function from the car R package (Fox et al., 2020) with the  
349 null hypothesis being “The slope of  $\log_{10}(\text{TCM})$  is equal to 1”. Then, we examined whether the  
350 scaling coefficient of mean thicknesses with TBV differed from  $\frac{1}{3}$  and whether the scaling  
351 coefficient of surface areas with TBV differed from  $\frac{2}{3}$  with the linearHypothesis function (Fox et  
352 al., 2020) and appropriate null (e.g., null hypothesis for mean thicknesses: “The slope of  
353  $\log_{10}(\text{TBV})$  is equal to  $\frac{1}{3}$ ”). We would expect these coefficients if brain growth was proportional  
354 (similar to a sphere) and if larger brains were scaled-up versions of smaller brains. Third, we  
355 examined sex differences in variance with a Levene’s test (F-test) and calculated as the variance  
356 ratio as Female SD / Male SD. Fourth, we compared the results of our main analysis to those  
357 obtained when using a linear covariate TCM adjustment (i.e., equation 4 without the log  
358 transformation) and when using the proportion adjustment for TCM (i.e., dividing a region by  
359 TCM to obtain an adjusted region measure and running equation 4 on the adjusted region without  
360 the log transformation and the main effect of TBV). Fifth, as preregistered, we attempted to  
361 replicate previous studies on cerebral sex differences that considered brain allometry. Sixth, we  
362 replicated Ritchie and colleagues’ (2018) analyses of the Desikan-Killiany cortical measures and  
363 FIRST subcortical volumes with the linear covariate TCM adjustment. We additionally ran the  
364 same analyses with the allometric TCM adjustment to examine whether we observed the same  
365 effects of omitting brain allometry when investigating sex differences in the UK Biobank using  
366 different cerebral segmentations and statistical analyses.

### 367 2.3.8 Multiple Comparison Corrections.

368 Considering that 620 regions and 11 beta coefficients were investigated for regional IDPs,  
369 three thresholds of significance were used: 0.05/11, 0.05/620, and 0.05/ (11 \* 620). The same  
370 rationale was applied to the global IDPs, with the following thresholds for TBV 0.05/5, 0.05/9,  
371 and 0.05/ (5 \* 9) and for the remaining global measures: 0.05/11, 0.05/9, and 0.05/ (11 \* 9).  
372 Significant variance ratio differences are reported at  $p < 0.05/629$  (sum of global and regional  
373 cerebral measures).

Abbreviations: Total Cerebral Measures (TCMs): Total Brain Volume (TBV), Total Mean 14  
Cortical Thickness (MCT), or Total Surface Area (TSA). Grey Matter Volume (GMV).  
White Matter Volume (WMV).



### 375 3. Results and Discussion

376 To avoid redundancy, results are sequentially discussed. Only results at the strictest level  
377 of significance are reported in text:  $p < 0.05 / (5 \times 9)$  for TBV,  $0.05 / (11 \times 9)$  for other global  
378 measures,  $p < 0.05 / (11 \times 620)$  for regional measures, and  $p < 0.05 / 629$  for sex differences in  
379 variance. Scaling coefficients ( $\alpha$ ) correspond to the estimate when continuous variables are  
380 centered, and standardized betas ( $\beta$ ) reflect the estimate when continuous variables are centered  
381 and scaled (1 SD).

382 Descriptive statistics are available in Supplemental Tables A2-14. Regression results by  
383 region are available in Supplemental Tables B1-B10 and by main effect or interaction, in  
384 Supplemental Tables C1-C15. See Supplemental Tables D2-D5 for statistics on regional  
385 deviance from isometry. Correlations between the left and right region in terms of the scaling  
386 coefficient with the TCM, the age standardized betas, and sex standardized betas are available on  
387 OSF, in Supplemental Figures File  
388 1([https://osf.io/s4qc5/?view\\_only=bb067d96d0df4ae4902f99747d60e828](https://osf.io/s4qc5/?view_only=bb067d96d0df4ae4902f99747d60e828)) and correlations  
389 between cortical scaling, sex, and age coefficients are available in Supplemental Table C1.

390

#### 391 3.1 Allometry

##### 392 3.1.1 Global Allometry

393 All global scaling coefficients were hypoallometric ( $\alpha$  ranging from 0.03 to 0.91),  
394 suggesting that these regions increase less than TBV as TBV increases, except for cerebral WMV,  
395 which was hyperallometric ( $\alpha = 1.21$ ). The scaling coefficient of TSA with TBV significantly  
396 differed from the theoretical value  $2/3$  ( $\alpha = 0.89$ ) and the scaling coefficient of Total MCT with  
397 TBV differed from  $1/3$  ( $\alpha = 0.03$ ). In cerebellar GMV, all regions were hypoallometric ( $\alpha = 0.50 -$   
398  $0.95$ ), except for 4 isometric regions ( $\alpha = 0.93 - 0.95$ ). Ventricles and the cerebral spinal fluid were  
399 hypoallometric ( $\alpha = 0.40 - 1.01$ ), except for the lateral ventricles (left  $\alpha = 1.01$  and right  $\alpha = 0.96$ ).  
400 The optic chiasm, corpus callosum, cerebellum WMV, and ventral diencephalon measures were  
401 hypoallometric ( $\alpha = 0.55 - 0.93$ ), whereas for the mid-anterior segmentation of the corpus callosum  
402 which was isometric ( $\alpha = 0.99$ ).

403 Allometric coefficients were generally consistent with previous studies that report  
404 hyperallometry in cerebral WMV (Jong et al., 2017; Toro et al., 2009) and hypoallometry in the  
405 majority of cerebellar (Mankiw et al., 2017), subcortical (Jong et al., 2017; Liu et al., 2014;  
Abbreviations: Total Cerebral Measures (TCMs): Total Brain Volume (TBV), Total Mean  
16  
Cortical Thickness (MCT), or Total Surface Area (TSA). Grey Matter Volume (GMV).  
White Matter Volume (WMV).



406 Reardon et al., 2016; Williams et al., 2020), and corpus callosum volumes (Lefebvre et al., 2015).  
407 See Supplemental Table D1 for global deviance from allometry.

### 408 3.1.2 Cortical Allometry

409 TBV was a significant positive predictor of all volumes, TSA of all surface areas, and Total  
410 MCT of all mean thicknesses. Scaling coefficients varied across regions and measures (Table 1).  
411 The scaling coefficients of cortical volumes were highly correlated to those of cortical surface  
412 areas ( $r = 0.85$ ,  $p < 2.2e-16$ ) but were not correlated to those of cortical mean thicknesses ( $r = -$   
413  $0.05$ ,  $p = 0.535$ ). In cortical regions, 98 volumes, 62 areas, and 63 mean thicknesses were  
414 hypoallometric ( $\alpha = 0.60 - 0.96$ ), while 18 volumes, 50 areas, and 58 mean thicknesses were  
415 hyperallometric ( $\alpha = 1.04-1.62$ ), and 32 volumes, 36 areas, and 27 mean thicknesses were  
416 isometric ( $\alpha = 0.94-1.11$ ; Figure 1).

417 These findings mirror those reported by Liu and colleagues (2014) and Reardon and  
418 colleagues (2018), who found that scaling across cortical regions is heterogeneous, covering a  
419 wide range of hypoallometry, isometry, and hyperallometry values. Similarly to Reardon and  
420 colleagues (2018), who studied the scaling relationship between vertex area and cortical surface  
421 area, surface areas were hyperallometric in the middle frontal and supramarginal gyri and sulci,  
422 and hypoallometric in the sensorimotor cortices (precentral, paracentral, and postcentral gyri and  
423 sulci), occipital temporal regions, and some cingulate (anterior, mid-anterior, and post dorsal) and  
424 callosal (sub and pericallosal) regions.

425

426

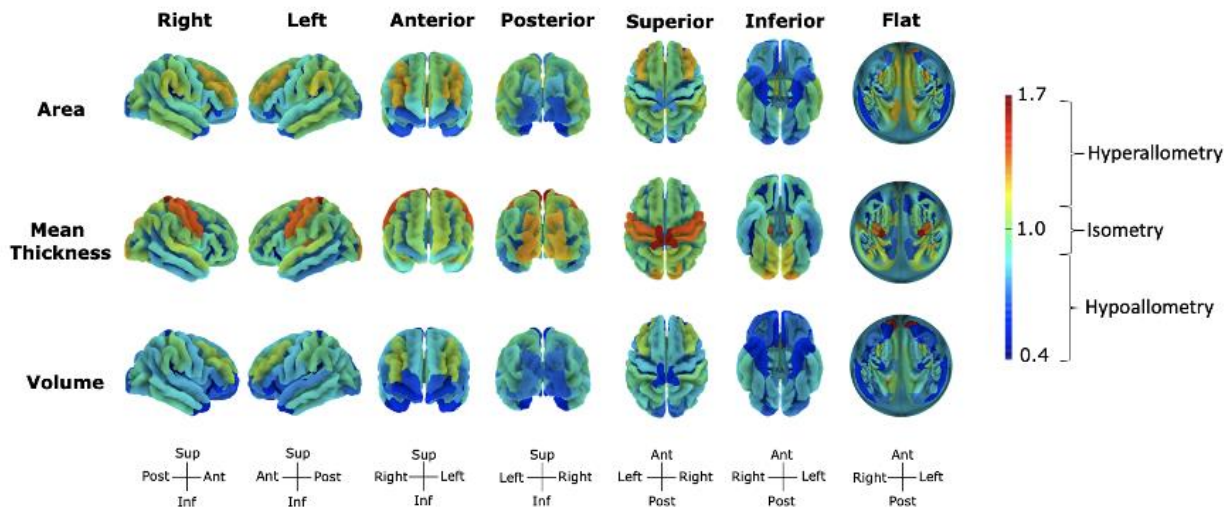

427

428 **Figure 1.** *Scaling Coefficients of Cortical Surface Areas, Mean Thicknesses, and Volumes with*  
429 *Total Brain Volume (TBV).* Values are the scaling coefficients of a region with TBV and range  
430 from 0.61 (volume of the right posterior ramus of lateral sulcus) to 1.63 (mean thickness of the  
431 left paracentral gyrus and sulcus). The flat representation corresponds to the flattened image of  
432 the superior view with the midline of the circle reflecting regions within the sagittal plane and  
433 circle edges reflecting inferior regions. Figures made with <https://neuroanatomy.github.io/cortex/>  
434 (Toro, 2020).

435

### 436 3.1.3 Subcortical Allometry

437 All subcortical volumes were hypoallometric ( $\alpha = 0.49 - 0.92$ ) except for the right lateral  
438 posterior and the right limitans suprageniculate nuclei, which were isometric ( $\alpha = 0.95, \alpha = 1.08$ ,  
439 respectively), and the left limitans suprageniculate nuclei and left accumbens area, which were  
440 hyperallometric ( $\alpha = 1.17, \alpha = 1.11$ , respectively).

441 General hypoallometry across whole subcortical structures is consistent with previous  
442 findings (Jäncke et al., 2015b; Liu et al., 2014; Williams et al., 2020). As for allometry within  
443 subcortical structures, Reardon and colleagues (2018) are the only ones to date that examined and  
444 reported variations in scaling within subcortical structures. However, the latter study examined the  
445 scaling relationship of the vertex area of subcortical subregions with cortical area, whereas the  
446 present study examined volumetric variations within these regions. Thus, our finding that  
447 allometry varies within subcortical volumes extends our understanding of the cerebral scaling  
448 relationships between regional and global measures.

449

### 450 3.1.4 Mean Thickness and Surface Area Scaling with TBV

451 Exploratory analyses on the scaling relationship between TBV and cortical mean  
452 thicknesses or surface areas revealed that the scaling coefficients of all mean thicknesses with TBV  
453 were different from one-third, whereas the scaling coefficients of 19 regional surface areas with  
454 TBV did not differ from two-thirds (Supplemental Tables D6-7).

455 This study adds the literature suggesting that larger brains are not simply a scaled-up  
456 version of smaller brains (Finlay et al., 2001; Im et al., 2008; Toro et al., 2008), as the first study  
457 to examine scaling coefficients of regional cortical surface areas and mean thicknesses with TBV  
458 that go beyond lobar segmentations. If the brain regions grew proportionally to brain size, total  
459 MCT would scale to the power of one-third with TBV, and TSA to the power of two-thirds with  
460 TBV (Finlay et al., 2001). Yet, we find that total MCT scaled to the power of 0.03 with TBV and  
461 that the majority of cortical mean thicknesses had allometric scaling coefficients close to 0,  
462 reflecting the stability of cortical mean thicknesses with TBV growth. Moreover, TSA scaled to  
463 the power of 0.89 with TBV and the majority of cortical surface areas had hypoallometric scaling  
464 coefficients that were greater than two-thirds. The greater than geometrically expected  
465 hypoallometry across surfaces can be explained by the dramatic increase in gyrification (Fish et

Abbreviations: Total Cerebral Measures (TCMs): Total Brain Volume (TBV), Total Mean 19  
Cortical Thickness (MCT), or Total Surface Area (TSA). Grey Matter Volume (GMV).  
White Matter Volume (WMV).

466 al., 2017), and more specifically, in sulcal convolution, that occurs with the expansion of TBV (Im  
467 et al., 2008; Toro et al., 2008). Finally, the heterogeneity of allometric patterns observed across  
468 the cortex may be explained by the nonuniform gyrification of the cortical surface (Fish et al.,  
469 2017).

470

### 471 3.1.5 Sex or Age-Dependent Allometry

472 Allometry depended on sex (0.2%, 12/628) or age (11%, 71/628) in relatively few regions  
473 (details in Supplemental Info 5.1). Sex differences in allometry were less frequent, although larger  
474 ( $|\alpha| = 0.05 - 0.12$ ), than age differences in allometry ( $|\alpha| = 0.01 - 0.04$ ). Regional volumes generally  
475 increased less with TBV in females, while mean thicknesses increased less with Total MCT in  
476 males. Although sparse, the presence of TCM interactions with age or sex suggest that matching  
477 individuals between groups by TCM may not be appropriate for all regions, as cerebral sex  
478 differences may reflect sex-dependent distributions of tissues instead of individual differences in  
479 brain size (Luders et al., 2009). Considering that these interactions are often overlooked in studies  
480 examining sex and age differences (e.g., Ritchie et al., 2018; Vinke et al., 2018), we suggest that  
481 they be considered to obtain unbiased estimates of age and sex effects on the brain and to  
482 accurately identify associations between brain regions and behavioral or cognitive traits.

483

### 484 3.1.6 Conclusion on Allometry

485 All brain regions varied with global brain measures, and the majority (86%) were  
486 allometric as they scaled non-linearly with their TCM. Of the regions exhibiting allometry,  
487 hypoallometry was reported in 93% of volumes, 55% of the cortical surface areas, and 52% of the  
488 cortical mean thicknesses (Table 1). While the association between scaling and cognition and  
489 behavior remains unknown, our study adds to the literature (Finlay et al., 2001; Jäncke et al.,  
490 2015b, 2019; Jong et al., 2017; Toro et al., 2009) supporting allometric scaling as an inherent  
491 property of the brain that varies across regions and cerebral measures, and provides scaling  
492 coefficients for regions that were not previously investigated (e.g., subcortical subsegmentations,  
493 ventricles etc.).

494

495

496 Table 1. Cerebral Regions Exhibiting Brain Allometry.

|                                                                                    | Measure                | N   | %  | Min. | 1st Qu. | Median | Mean | 3rd Qu. | Max  |
|------------------------------------------------------------------------------------|------------------------|-----|----|------|---------|--------|------|---------|------|
| <b>Cortical Surface Areas (N = 148)</b>                                            | <i>Hypoallometric</i>  | 62  | 42 | 0.64 | 0.76    | 0.83   | 0.82 | 0.91    | 0.95 |
|                                                                                    | <i>Hyperallometric</i> | 50  | 34 | 1.06 | 1.1     | 1.13   | 1.16 | 1.21    | 1.39 |
| <b>Cortical Mean Thicknesses (N = 148)</b>                                         | <i>Hypoallometric</i>  | 63  | 43 | 0.66 | 0.78    | 0.84   | 0.83 | 0.89    | 0.96 |
|                                                                                    | <i>Hyperallometric</i> | 58  | 39 | 1.04 | 1.09    | 1.14   | 1.2  | 1.31    | 1.62 |
| <b>Cortical Volumes (N = 148)</b>                                                  | <i>Hypoallometric</i>  | 98  | 66 | 0.6  | 0.73    | 0.82   | 0.8  | 0.89    | 0.96 |
|                                                                                    | <i>Hyperallometric</i> | 18  | 12 | 1.05 | 1.07    | 1.1    | 1.15 | 1.16    | 1.59 |
| <b>Freesurfer Subcortical Subsegmentation Volumes (N = 116)</b>                    | <i>Hypoallometric</i>  | 113 | 97 | 0.49 | 0.68    | 0.75   | 0.74 | 0.8     | 0.92 |
|                                                                                    | <i>Hyperallometric</i> | 1   | 1  | 1.17 | 1.17    | 1.17   | 1.17 | 1.17    | 1.17 |
| <b>FAST Cerebellar Volumes (N = 28)</b>                                            | <i>Hypoallometric</i>  | 24  | 86 | 0.5  | 0.68    | 0.74   | 0.75 | 0.82    | 0.94 |
| <b>ASEG Subcortical Volumes (N = 8)</b>                                            | <i>Hypoallometric</i>  | 7   | 88 | 0.69 | 0.73    | 0.75   | 0.78 | 0.81    | 0.92 |
|                                                                                    | <i>Hyperallometric</i> | 1   | 13 | 1.11 | 1.11    | 1.11   | 1.11 | 1.11    | 1.11 |
| <b>ASEG Ventricle &amp; CSF Volumes (N = 10)</b>                                   | <i>Hypoallometric</i>  | 7   | 70 | 0.4  | 0.47    | 0.49   | 0.51 | 0.55    | 0.62 |
|                                                                                    | <i>Hyperallometric</i> | 1   | 7  | 1.21 | 1.21    | 1.21   | 1.21 | 1.21    | 1.21 |
| <b>ASEG Cerebellum, Corpus Callosum, Ventral DC, Optic Chiasm Volumes (N = 14)</b> | <i>Hypoallometric</i>  | 12  | 86 | 0.55 | 0.66    | 0.78   | 0.76 | 0.85    | 0.93 |
|                                                                                    | <i>Hyperallometric</i> | 1   | 7  | 1.21 | 1.21    | 1.21   | 1.21 | 1.21    | 1.21 |
| <b>Global Measures (N = 9)</b>                                                     | <i>Hypoallometric</i>  | 8   | 89 | 0.03 | 0.77    | 0.73   | 0.83 | 0.9     | 0.91 |
|                                                                                    | <i>Hyperallometric</i> | 1   | 11 | 1.21 | 1.21    | 1.21   | 1.21 | 1.21    | 1.21 |

*N.B.* Values displayed are allometric scaling coefficients ( $\alpha$ ). Hyperallometric  $\alpha > 1$ , and Hypoallometric:  $\alpha < 1$ . CSF: Cerebral Spinal Fluid. DC: Diencephalon.

497

498

Abbreviations: Total Cerebral Measures (TCMs): Total Brain Volume (TBV), Total Mean Cortical Thickness (MCT), or Total Surface Area (TSA). Grey Matter Volume (GMV). White Matter Volume (WMV). 21

## 499 3.2 Sex Differences

### 500 3.2.1 Global Measures

501 TBV was significantly larger in males than in females ( $\beta = -1.14$ ). Once TBV was adjusted  
502 for with the allometric adjustment (equation 3), the cerebellar WMV ( $\beta = 0.27$ ), cerebellar GMV  
503 ( $\beta = 0.25$ ), total MCT ( $\beta = 0.12$ ), and cerebral WMV ( $\beta = 0.06$ ) were greater in females, while  
504 brainstem volume ( $\beta = -0.21$ ), total subcortical volumes ( $\beta = -0.08$ ), TSA ( $\beta = -0.07$ ), and cerebral  
505 GMV ( $\beta = -0.02$ ) were greater in males.

506 Consistent with previous studies, males had a larger TBV (e.g., Ritchie et al., 2018;  
507 Ruigrok et al., 2014), while females had a relatively larger Total MCT (Im et al., 2008, p. 200; van  
508 Velsen et al., 2013). However, we did not find that males and females had a similar TSA (Im et  
509 al., 2008), nor did we observe greater cerebral WMV in males relative to brain size (Chen et al.,  
510 2007; Gur et al., 1999). Instead, our analyses revealed that males have a larger TSA and females a  
511 greater cerebral WMV. Considering the small magnitude of these sex differences ( $<0.1$ ) and the  
512 sample size of the previous studies ( $N < 150$ ), we speculate that these studies were not sufficiently  
513 powered to reliably estimate these effects.

### 514 3.2.1 Cerebellar GMV

515 The Freesurfer ASEG Cerebellum GMV – used to calculate TBV – was larger in males ( $\beta$   
516 = -0.36), whereas the FAST Cerebellum GMV – calculated as the sum of the cerebellar lobes and  
517 vermes from FAST Diedrichsen Cerebellar Atlas – was larger in females ( $\beta = 0.25$ ).

518 Result discrepancies between segmentation algorithms may stem from Diedrichsen's  
519 segmentation algorithm ignoring individual WMV and GMV intensities, which are taken into  
520 account by Freesurfer. Or differences may be due to Freesurfer over-labelling peripheral tissue as  
521 it is more sensitive in regions of low contrast between tissue types (Carass et al., 2018). Although  
522 the cerebellar GMV of the FAST and ASEG segmentations only correlated at 76%, discrepancies  
523 across cerebellar segmentations did not influence our measure of TBV, as the TBV calculated by  
524 summing regional segmentations (including the FAST GMV) correlated at 99.8% with our  
525 measure of TBV (derived from the ASEG segmentations).

### 526 3.2.3 Regional Cerebellar GMVs

527 When examining sex differences in the cerebellum with the FAST cerebellum regional  
528 segmentations, females had larger cerebellar GMV in 82% of regions (23/28) with coefficients  
529 ranging from 0.08 (Right Crus I) to 0.64 (Vermis X). The crus I vermis and the left and right lobule

530 V did not differ between sexes and the left and right lobule X were larger in males ( $\beta = -0.17$ ,  $\beta =$   
531  $-0.12$ , respectively).

532 Our findings contrast with the literature on sex differences within cerebellum (review in  
533 Han et al., 2020). For instance, Han and colleagues (2020) instead reported that the VIIIA lobules  
534 were larger in males and that the right I–III lobules, and IX and X Vermes were larger in females  
535 when adjusting for intracranial volume with the linear covariate method. Moreover, in our  
536 replication of Mankiw and colleagues' (2017) study, we found that, instead of being greater in  
537 males, the cerebellum, flocculus, cerebellar lobule VIIb, VIIb, and VIIA, and Crus II volumes were  
538 greater in females and that the flocculus volume did not vary between sexes. Although both studies  
539 used segmentation algorithms that have a better parcellation accuracy than the SUIT segmentation  
540 (Diedrichsen et al., 2009) of the present study (Carass et al., 2018; S. Han, Carass, et al., 2020),  
541 discrepancies in the literature may also stem from differences in sample age (mean age = 12.5 and  
542 70 years old, respectively) and size (N = 116 and 2,023, respectively).

543 In light of the difficulty of segmenting the cerebellum and the differences in regional  
544 specificity and accuracy across segmentations, we suggest that future studies take advantage of the  
545 large UK Biobank dataset to apply and compare cerebellar segmentation algorithms.

546

### 547 3.2.4 Whole Subcortical Volumes

548 The thalamus (Right  $\beta = -0.15$ , Left  $\beta = -0.08$ ), putamen (Left and Right  $\beta = -0.18$ ), left  
549 pallidum ( $\beta = -0.08$ ), and left amygdala ( $\beta = -0.12$ ) were larger in males and the hippocampus  
550 (Right  $\beta = 0.07$ , Left  $\beta = 0.06$ ) and left accumbens were larger in females ( $\beta = 0.10$ ). The right  
551 pallidum volume, the caudate volumes, and the right accumbens area volume did not differ  
552 between sexes.

553 Our findings are consistent with previous studies reporting greater thalamic volume in  
554 males (Lotze et al., 2019) and larger hippocampal volumes in females (Malykhin et al., 2017;  
555 Nordenskjöld et al., 2015), although they contrast with research supporting the absence of sex  
556 differences in the amygdala (Lotze et al., 2019) and the hippocampus (Ritchie et al., 2018; Tan et  
557 al., 2016) or greater male hippocampal volume (Lotze et al., 2019; Pintzka et al., 2015). And yet,  
558 we similarly find that males have larger putamen, pallidum, and left amygdala volumes in our  
559 replication of studies examining sex differences when considering brain allometry (Reardon et al.,  
560 2016; Sanchis-Segura et al., 2019).

Abbreviations: Total Cerebral Measures (TCMs): Total Brain Volume (TBV), Total Mean Cortical Thickness (MCT), or Total Surface Area (TSA). Grey Matter Volume (GMV). White Matter Volume (WMV). 23

561 We additionally replicated Ritchie and colleagues' (2018) findings that males had greater  
562 pallidum, putamen, and amygdala volumes, when adjusting for TBV with the linear covariate  
563 adjustment and analyzing FIRST subcortical segmentations. For a detailed analysis of the  
564 replication by region see Supplemental Info 6.4.2 and Supplemental Tables G5-9.

565 When adjusting for TBV with the linear covariate or the allometric approach in the  
566 replication models with the FIRST segmentations, we found similar subcortical sex differences to  
567 those reported in our main analyses with the Freesurfer segmentations with some exceptions.  
568 Specifically, instead of being larger in males, the left thalamus was larger in females and right  
569 thalamus did not show sex differences in the replication models. Moreover, the right accumbens  
570 area was larger in females and the right pallidum was larger in males in the replication analyses,  
571 although they did not differ between sexes in the main analyses. These discrepancies may stem  
572 from the different terms and interactions included in the main and replication analyses or from  
573 differences between the FIRST and Freesurfer subcortical segmentations. For instance, FIRST  
574 provides a segmentation of the amygdala more similar to that of manual tracing than Freesurfer  
575 (Morey et al., 2009), although the amygdala agreement with manual segmentation is relatively  
576 poor compared to other regions such as the hippocampus (Morey et al., 2010), potentially due to  
577 the complexity of the structure (Schoemaker et al., 2016).

578 Sex differences from our main analyses additionally varied across hemispheres. For  
579 instance, the amygdala volume was larger for males in the left hemisphere and similar across sexes  
580 in the right hemisphere. However, seemingly inconsistent results on whole subcortical structures  
581 may be illuminated by examining their subcomponents, as provided by the Freesurfer subcortical  
582 subsegmentations.

### 583 3.2.5 Subcortical Subsegmentations

584 Sex differences were found in 67% of the subcortical subsegmentations (74/110), with  
585 greater male volume in 42 (38%) regions and greater female volume in 32 (29%) regions (details  
586 in Supplemental Info 5.2.3).

587 The magnitude of the subsegmentation subcortical sex differences was not perceptible at  
588 the whole subcortical level due to the presence of sex differences in opposite directions. For  
589 instance, medial and lateral regions of the thalamus were considerably larger in females ( $\beta$  ranging  
590 from 0.06 to 0.25), although the whole thalamus volume was greater in males (Right  $\beta = -0.15$ ,  
591 Left  $\beta = -0.08$ ). Moreover, the right cortical nucleus ( $\beta = 0.13$ ) was larger in females even though

Abbreviations: Total Cerebral Measures (TCMs): Total Brain Volume (TBV), Total Mean 24  
Cortical Thickness (MCT), or Total Surface Area (TSA). Grey Matter Volume (GMV).  
White Matter Volume (WMV).



592 sex differences were absent in the whole right segmentation of amygdala. Taken together, these  
593 findings support a high variability of sex differences within subcortical structures and highlights  
594 the importance of favoring fine-grained segmentations, as done in this study, to better understand  
595 where cerebral sex differences lie.

### 596 3.2.6 Cortical Regions

597 Cortical sex differences were present in 57% of surface areas (84/148) and 66% of volumes  
598 (97/148) and mean thicknesses (98/148). No clear spatial trend in sex differences was apparent  
599 across lobes. In terms of cortical volumes, 62 regions (42%) were larger in males, ranging from -  
600 0.27 (right occipital pole) to -0.06 (right inferior temporal sulcus), and 35 regions (24%) were  
601 larger in females, ranging from 0.06 (right precentral gyrus) to 0.26 (right postcentral gyrus). As  
602 for cortical mean thicknesses, 50 regions (34%) were greater in males and 48 (32%) were greater  
603 in females. Greater mean thicknesses in males varied from -0.39 (left medial orbital – olfactory-  
604 sulcus) to -0.05 (parieto-occipital sulcus or fissure), while greater mean thicknesses in females  
605 ranged from 0.06 (left transverse frontopolar gyri and sulci) to 0.31 (left transverse temporal  
606 sulcus). Finally, in terms of cortical surface areas, males had larger surface areas in 50 regions  
607 (34%) ranging from -0.22 (right medial occipito-temporal-collateral – sulcus and lingual sulcus)  
608 to -0.06 (left precentral gyrus), and females had larger surface areas in 34 regions (23%) with  
609 coefficients ranging from 0.06 (left superior frontal sulcus) to 0.21 (right anterior transverse  
610 temporal gyrus of Heschl; Figure 3).

611 We replicated the majority of sex differences (88%, 90/98) reported by Ritchie and  
612 colleagues (2018) with the Desikan-Killiany Cortical segmentations when adjusting for TCM with  
613 the linear covariate approach. We observed significant sex differences in additional regions (81%,  
614 150/186), possibly due to our larger sample size. Sex differences from the main analyses with the  
615 Destrieux segmentation and the replication analyses with the Desikan-Killiany appeared to be  
616 generally consistent.

617 In line with a study of cortical volumetric sex differences in 411 middle aged participants  
618 (Chen et al., 2007), we found that males had a larger left inferior temporal gyrus and larger right  
619 occipital lingual and right middle temporal gyri, while females had a larger right inferior parietal  
620 gyrus, right post-dorsal part of the cingulate gyrus and sulcus, and left and right mid-anterior and  
621 post-ventral parts of the cingulate gyrus. Consistent with a study of 2 838 middle aged adults  
622 (Lotze et al., 2019), we found that females have larger volumes in the superior parietal lobe and

Abbreviations: Total Cerebral Measures (TCMs): Total Brain Volume (TBV), Total Mean 25  
Cortical Thickness (MCT), or Total Surface Area (TSA). Grey Matter Volume (GMV).  
White Matter Volume (WMV).

623 right orbitofrontal cortex, whereas males have larger volumes in the left temporal pole and right  
624 fusiform gyrus. Yet, in contrast with the previous literature on sex differences in GMV (Lotze et  
625 al., 2019; Ritchie et al., 2018; Ruigrok et al., 2014), we reported that females have a larger  
626 precentral gyri than males and that males have a larger right anterior part of the cingulate gyrus  
627 and sulcus than females. Moreover, we did not find sex differences in the left anterior part of the  
628 cingulate gyrus and sulcus, although past studies suggest that this volume was larger in females  
629 (Lotze et al., 2019; Ruigrok et al., 2014). The divergence in some of the presented results can  
630 partly be attributed to differences in sample size, varying neuroimaging techniques, and to the  
631 small size of these effects (median  $|\beta| = 0.09$ ) as well as to differences in sample age range. And  
632 yet, we observed a similar pattern of sex differences in our replication of Ritchie and colleagues'  
633 (2018) analyses with the allometric adjustment for TCM, suggesting that the different terms  
634 included in our models and the differences between the Destrieux and the Desikan-Killiany Atlases  
635 had little influence on the majority reported cortical sex differences.  
636

637

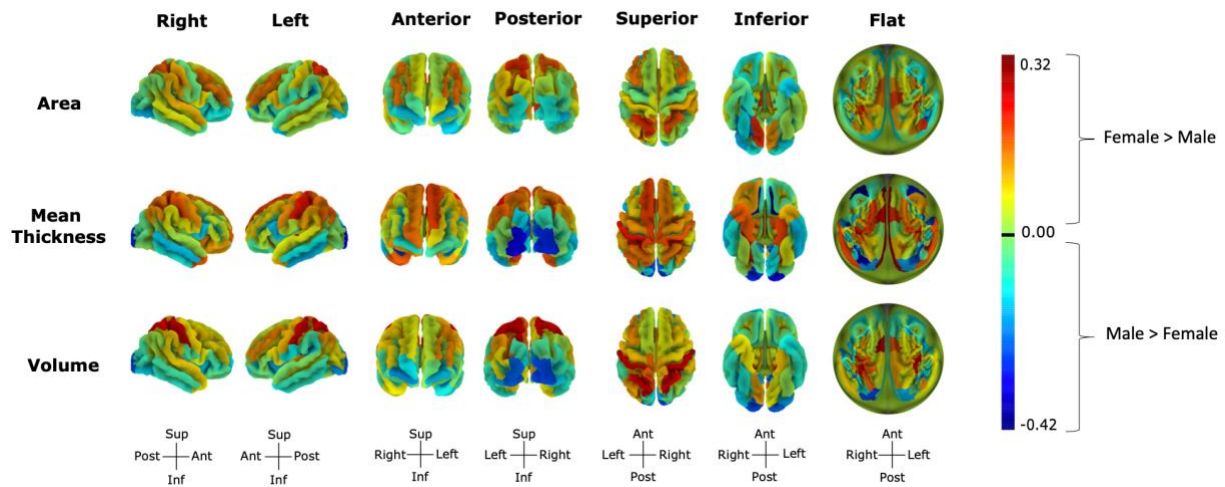

638

639 **Figure 2.** Sex Differences across Cortical Measures. Sex effects differences from -0.40 (mean  
640 thickness of the left medial orbital sulcus) to 0.32 (mean thickness of the left transverse temporal  
641 sulcus). Negative effects reflect greater male than female volumes. The flat representation  
642 corresponds to the flattened image of the superior view with the midline of the circle reflecting  
643 regions within the sagittal plane and circle edges reflecting inferior regions. Figures made with  
644 <https://neuroanatomy.github.io/cortex/> (Toro, 2020).

645

### 646 3.2.7 Sex Differences in Variance

647 In addition to observing mean sex differences in two-thirds of regions, we found sex  
648 differences in variance in 49% (306/629) of regions. A total of 253 (40%) regions exhibited greater  
649 male variability and 56 (9%) exhibited greater female variability (Table 2). Sex differences in  
650 variance ranged from 0.82 (for the right cerebellar lobule VIIIA, implying greater male variability)  
651 to 1.17 (for the optic chiasm; Supplemental Info 6.1 and Supplemental Tables E1-7).

652 As reported by previous studies (Ritchie et al., 2018; Wierenga et al., n.d., 2018, 2019),  
653 the majority of brain regions with sex differences in variance were more variable in males (82%)  
654 compared to females (18%). Mean thicknesses were generally more variable in females, while  
655 volumes and surface areas were more variable in males. Overall, cerebellar lobes and vermes were  
656 also more variable in males. Sex differences in variance across subcortical subsegmentations were  
657 greater in males in the hippocampus, amygdala, and thalamus. In terms of whole subcortical  
658 volumes, both the hippocampus, which was larger in females, and caudate, which did not show  
659 mean sex differences, were more variable in males. Finally, regions that were larger in one sex  
660 were typically more variable in the other sex.

661 Differences in variance thus do not appear to be a mechanical consequence of differences  
662 in mean, and instead may reflect a distinct phenomenon known as the greater male variability  
663 hypothesis. This hypothesis states that males are more variable than females across a variety of  
664 psychological and physical characteristics (Ellis, 1894) and is widely supported by a range of  
665 human (e.g., Johnson et al., 2008; Ju et al., 2015; Karwowski et al., 2016; Lehre et al., 2009;  
666 Wierenga et al., 2019) and animal (e.g., Branch et al., 2020; DeCasien et al., 2020) studies.  
667 Although the mechanisms behind the greater male variability hypothesis exceed the scope of the  
668 present study, our findings further support greater male variability, which extends well beyond  
669 brain measures.

670

671

672 *Table 2. Variance Ratios of Sex Differences across Segmentations*

| <i>Segmentation</i>                                                                           |                     | <b>Sex Differences in Variance Ratio</b> |          | <b>min</b> | <b>1st Qu.</b> | <b>median</b> | <b>mean</b> | <b>3rd Qu.</b> | <b>max</b> |
|-----------------------------------------------------------------------------------------------|---------------------|------------------------------------------|----------|------------|----------------|---------------|-------------|----------------|------------|
|                                                                                               |                     | <b>N</b>                                 | <b>%</b> |            |                |               |             |                |            |
| <i>Cortical Volumes</i><br>( <i>N</i> = 148)                                                  | <i>M</i> > <i>F</i> | 63                                       | 43       | 0.91       | 0.94           | 0.95          | 0.95        | 0.96           | 0.97       |
|                                                                                               | <i>M</i> < <i>F</i> | 5                                        | 3        | 1.02       | 1.04           | 1.05          | 1.07        | 1.08           | 1.14       |
| <i>Cortical Surface Areas</i><br>( <i>N</i> = 148)                                            | <i>M</i> > <i>F</i> | 71                                       | 48       | 0.90       | 0.94           | 0.95          | 0.95        | 0.96           | 0.97       |
|                                                                                               | <i>M</i> < <i>F</i> | 8                                        | 5        | 1.03       | 1.04           | 1.04          | 1.06        | 1.08           | 1.14       |
| <i>Cortical Mean Thicknesses</i><br>( <i>N</i> = 148)                                         | <i>M</i> > <i>F</i> | 26                                       | 18       | 0.9        | 0.95           | 0.95          | 0.95        | 0.96           | 0.97       |
|                                                                                               | <i>M</i> < <i>F</i> | 36                                       | 24       | 1.03       | 1.05           | 1.06          | 1.06        | 1.07           | 1.15       |
| <i>Cerebellar Volumes</i><br>( <i>N</i> = 28)                                                 | <i>M</i> > <i>F</i> | 23                                       | 16       | 0.82       | 0.90           | 0.94          | 0.92        | 0.95           | 0.97       |
|                                                                                               | <i>M</i> < <i>F</i> | 2                                        | 1        | 1.04       | 1.04           | 1.04          | 1.04        | 1.04           | 1.04       |
| <i>Subcortical Subsegmentations</i><br>( <i>N</i> = 116)                                      | <i>M</i> > <i>F</i> | 64                                       | 55       | 0.88       | 0.93           | 0.94          | 0.94        | 0.96           | 0.97       |
| <i>ASEG Subcortical Volumes</i><br>( <i>N</i> = 8)                                            | <i>M</i> > <i>F</i> | 2                                        | 25       | 0.95       | 0.96           | 0.96          | 0.96        | 0.96           | 0.96       |
| <i>ASEG Ventricle &amp; CSF Volumes</i><br>( <i>N</i> = 10)                                   | <i>M</i> > <i>F</i> | 2                                        | 20       | 0.95       | 0.95           | 0.95          | 0.95        | 0.95           | 0.96       |
|                                                                                               | <i>M</i> < <i>F</i> | 2                                        | 20       | 1.07       | 1.08           | 1.09          | 1.09        | 1.1            | 1.11       |
| <i>ASEG Cerebellum, Corpus Callosum, Ventral DC, Optic Chiasm Volumes</i><br>( <i>N</i> = 14) | <i>M</i> > <i>F</i> | 5                                        | 36       | 0.93       | 0.94           | 0.95          | 0.95        | 0.95           | 0.96       |
|                                                                                               | <i>M</i> < <i>F</i> | 3                                        | 21       | 1.02       | 1.03           | 1.04          | 1.08        | 1.1            | 1.17       |
| <i>Global Measures</i><br>( <i>N</i> = 9)                                                     | <i>M</i> > <i>F</i> | 1                                        | 11       | 0.90       | 0.90           | 0.90          | 0.90        | 0.90           | 0.90       |

673 *N.B.* Values represent Variance Ratios. *M*: Male, *F*: Female. Variance Ratio = Female SD / Male  
674 SD. Qu.: Quartile. CSF: Cerebral Spinal Fluid.

Abbreviations: Total Cerebral Measures (TCMs): Total Brain Volume (TBV), Total Mean Cortical Thickness (MCT), or Total Surface Area (TSA). Grey Matter Volume (GMV). White Matter Volume (WMV). 29

### 675 3.2.8 Conclusion on Sex Differences

676 Overall, we found that sex differences in the brain are the rule rather than the exception,  
677 affecting two-thirds (419/629) of the investigated brain measures, with 231 regions relatively  
678 greater in males. The standardized coefficients ( $\beta$ ) of the sex effect of cortical volumes were highly  
679 correlated to those of cortical surface areas ( $r = 0.77$ ,  $p = 2.28e-43$ ) and moderately so for cortical  
680 mean thicknesses ( $r = 0.45$ ,  $p = 1.23e-08$ ).

681 Although many of the regional sex differences had very small effect sizes ( $\beta < 0.1$ ) and  
682 were only significant due to the large sample size, 46% of these cerebral measures (292/629) had  
683 a sex difference above 0.1. Specifically, sex differences in cerebellar GMV and WMV, Total MCT,  
684 the corpus callosum, and the ventricles were generally greater than 0.1 (details in Supplemental  
685 Info 5.2), whereas sex differences in cerebral GMV and WMV, TSA, 51% of subcortical regions  
686 and 35 - 45% of the cortical regions were under 0.1.

687

## 688 3.3 Age Effects

### 689 3.3.1 Global Measures

690 All cerebral measures decreased linearly with age ( $\beta$  ranging from -0.04 in to -0.33), except  
691 for the brainstem volume, TSA, and cerebral WMV which increased (relatively to TBV) with age  
692 ( $\beta = 0.13$ ,  $\beta = 0.11$ ,  $\beta = 0.04$ , respectively). The quadratic age term did not significantly predict  
693 cerebral GMV and WMV or the brainstem volume. However, total subcortical volume ( $\beta = 0.01$ )  
694 and TSA ( $\beta = 0.02$ ) positively, and TBV ( $\beta = -0.05$ ), total MCT ( $\beta = -0.04$ ), cerebellar GMV ( $\beta =$   
695  $-0.05$ ), and cerebellar WMV ( $\beta = -0.02$ ) negatively varied with quadratic age.

696 In line with the literature, TBV and Total MCT decreased with linear and quadratic age  
697 (Ritchie et al., 2018; van Velsen et al., 2013; Vinke et al., 2018) and Total MCT decreased more  
698 rapidly with linear age in males (van Velsen et al., 2013). Yet, our finding that TSA increased with  
699 linear and quadratic age contrasts with previous reports of a decrease in surface area across the  
700 lifespan (Hogstrom et al., 2013; Lemaitre et al., 2012; Long et al., 2012). Divergent results between  
701 our study and those of Hogstrom and colleagues (2013) and Long and colleagues (2012) can be  
702 explained by their omission of brain size, as we similarly observed a decrease of TSA with age  
703 when excluding TBV from our models. However, when applying the proportion TCM adjustment,  
704 as done by Lemaitre and colleagues (2012), we observed an increase in TSA with age, suggesting  
705 that differences between our studies may instead stem from differences in segmentation or sample

Abbreviations: Total Cerebral Measures (TCMs): Total Brain Volume (TBV), Total Mean 30  
Cortical Thickness (MCT), or Total Surface Area (TSA). Grey Matter Volume (GMV).  
White Matter Volume (WMV).

706 characteristics (e.g., smaller sample (N = 216), wider age range (18 to 87 years old)). Based on  
707 our findings, the relative expansion of TSA in older adults with age may reflect a global spread of  
708 the sulci, which appears to occur more rapidly in males than females.

### 709 3.3.2 Cerebellar Volumes

710 There was a linear decline with age of the cerebellar GMV for the FAST ( $\beta = -0.20$ ) and  
711 the Freesurfer ASEG ( $\beta = -0.02$ ) segmentations. However, the FAST cerebellar GMV was also  
712 negatively predicted by quadratic age ( $\beta = -0.05$ ) and its linear decline with age was quicker in  
713 males compared to females ( $\beta = 0.03$ ). As for the regional FAST cerebellar GMVs, 27 out of 28  
714 (96%) cerebellar volumes decreased linearly with age. The age effect in the cerebellar IX vermis  
715 ( $\beta = -0.02$ ) did not reach significance. Linear age effects ranged from -0.20 (right Crus I) to -0.05  
716 (vermis Crus I). We found a negative quadratic age effect in 74% (20/27) of regions with a linear  
717 age effect, which ranged from -0.07 (Left Cerebellar Lobule VIIb) to -0.03 (Right Cerebellar  
718 Lobule VIIb). The cerebellar IX vermis was the only area with a quadratic age but no linear age  
719 effect ( $\beta = -0.04$ ).

720 The linear decrease with age of the cerebellum mirrors previous findings (for review  
721 Bernard and Seidler, 2014). The literature also similarly reports a linear rather than a non-linear  
722 cerebellar change with age (for review Fjell et al., 2013; Fjell & Walhovd, 2010) and the absence  
723 of an age by sex interaction in cerebellar volumes (Hoogendam et al., 2012; Raz et al., 2005) when  
724 examining the Freesurfer segmentation of the cerebellum. The discrepancies in results between  
725 cerebellar segmentations further highlight the nonnegligible impact that the type of cerebellar  
726 segmentation algorithm has on reported results (as discussed in section 3.2.2 and 3.2.3).

727 Although our findings add to the scarce literature on age related changes within the  
728 cerebellum, age effects in these GMVs remain highly inconsistent (Bernard & Seidler, 2013; S.  
729 Han, An, et al., 2020; Koppelmans et al., 2017). We speculate that these differences in reported  
730 results can be attributed to the insufficient sample size of previous studies to investigate the these  
731 effects (our median  $|\beta| = 0.17$ ; N = 54 for Bernard and Seidler (2013) and N = 213, for Koppelmans  
732 et al. 2017) and differences in segmentation algorithms, which vary in accuracy and in the number  
733 of segmented cerebellar regions (Carass et al., 2018; L. Han et al., 2019).

### 734 3.3.3 Whole Subcortical and Subcortical Subsegmentation Volumes

735 The putamen ( $\beta = -0.09$  for both), accumbens area (Left  $\beta = -0.33$ , Right  $\beta = -0.24$ ),  
736 amygdala (Left  $\beta = -0.16$ , Right  $\beta = -0.14$ ), and hippocampus (Left  $\beta = -0.23$ , Right  $\beta = -0.19$ )  
Abbreviations: Total Cerebral Measures (TCMs): Total Brain Volume (TBV), Total Mean 31  
Cortical Thickness (MCT), or Total Surface Area (TSA). Grey Matter Volume (GMV).  
White Matter Volume (WMV).

737 decreased with age. The pallidum (Left  $\beta = 0.03$ , Right  $\beta = 0.06$ ) and caudate (Left  $\beta = 0.12$ , Right  
738  $\beta = 0.15$ ) volumes increased with linear age, whereas the thalamus did not show significant linear  
739 age effects. The accumbens area, amygdala, and hippocampus volumes had a negative quadratic  
740 age effect, ranging from -0.03 (right accumbens area) to -0.09 (left presubiculum head), and the  
741 thalamus, caudate, and right putamen all showed positive quadratic age effects, ranging from 0.02  
742 (right putamen) to 0.06 (left caudate).

743 Linear age was a significant predictor of 95% (104/110) of subsegmentations and quadratic  
744 age was a significant predictor of 88 (104/110) subsegmentations. Although there were no age  
745 effects at the whole subcortical level of the thalamus, we found 24 linear age effects with an  
746 absolute effect size greater than 0.1 across thalamic subsegmentations. More positive linear and  
747 quadratic age effects were found in ventral and intralaminar thalamic volumes. On the other hand,  
748 the majority of the amygdala and the hippocampal subsegmentations (>92%) decreased with age.  
749 The direction of the quadratic age effects on subcortical subsegmentations was similar to that of  
750 the whole subcortical volumes, as we found negative quadratic age effects across the amygdala  
751 and hippocampal subsegmentations and positive quadratic age effects across the thalamic  
752 subsegmentations.

753 The volumetric decline in the amygdala, hippocampus, putamen, and nucleus accumbens  
754 with age mirrors previous findings (Hogstrom et al., 2013; Kurth et al., 2017; Sele et al., 2020;  
755 Vinke et al., 2018). However, our finding of an increase in pallidum volume with age contrasts  
756 with past studies reporting a small decrease with age in this region (Sele et al., 2020; Vinke et al.,  
757 2018). Moreover, while we add to the literature reporting an expansion of the caudate with age  
758 (Vinke et al., 2018), a small decrease has also been reported (Sele et al., 2020). In terms of the  
759 discrepancy in the caudate results, we speculate that Sele and colleagues' (2020) sample (N = 231)  
760 was insufficient to observe such small changes with age ( $\beta = 0.05$ -0.06). As for the discrepancies  
761 in the pallidum results, differences may be attributed to the different terms included in the  
762 regressions, as Vinke and colleagues (2018) modeled non-linear changes with splines instead of a  
763 quadratic age.

#### 764 3.3.4 Cortical Regions

765 Cortical regions increased with linear age in 22% of volumes, 35% of mean thicknesses,  
766 24% of surface areas, and declined with linear age in 41% of volumes, 52% of mean thicknesses,  
767 33% of surface areas (Figure 3). Cortical volumes decreased linearly with age in 60 regions,  
Abbreviations: Total Cerebral Measures (TCMs): Total Brain Volume (TBV), Total Mean 32  
Cortical Thickness (MCT), or Total Surface Area (TSA). Grey Matter Volume (GMV).  
White Matter Volume (WMV).



768 ranging from -0.13 (right precentral gyrus) to -0.02 (right parieto-occipital sulcus), and increased  
769 with age in 33 regions, ranging from 0.03 (right superior segment of circular sulcus of the insula)  
770 to 0.13 (left central sulcus). Cortical mean thicknesses decreased with age in 77 regions, ranging  
771 from -0.14 (right inferior circular sulcus of the insula) to -0.02 (left posterior dorsal cingulate  
772 gyrus), and increased with age in 52 regions, ranging from 0.02 (left middle occipital gyrus) to  
773 0.22 (right cuneus gyrus). Surface areas increased linearly with age in 36 regions, ranging from  
774 0.02 (left superior frontal gyrus) to 0.15 (right central sulci), and decreased with age in 49 regions,  
775 ranging from -0.11 (right the orbital sulci) to -0.02 (left lateral aspect of the superior temporal  
776 gyrus). In contrast, a positive quadratic age effect was reported in 5% of volumes, 6% of mean  
777 thicknesses, 3% of surface areas, and a negative quadratic age effect was reported in 1% of  
778 volumes, 9% of mean thicknesses, 3% of surface areas. For further details on cortical age effects,  
779 see Supplemental Word Document Section 5.3.

780 Our findings coincide with and extend the literature reporting large age-related changes  
781 across the cortical measures (e.g., Fjell et al., 2009; Lotze et al., 2019; Pintzka et al., 2015; Salat  
782 et al., 2004; Storsve et al., 2014) The majority of frontal volumes decreased with linear age, while  
783 frontal surface areas decreased with age in the orbital gyri and sulci and the inferior frontal gyrus  
784 and frontal mean thicknesses decreased with age in the frontal medial and frontal superior regions.  
785 Temporal surface areas and volumes generally decreased with linear age, whereas age effects on  
786 temporal mean thicknesses were more variable. For instance, we observed a mean thickness  
787 thinning in the lateral aspect of the superior temporal gyrus and the middle temporal gyrus and a  
788 thickness increase of the planum polare, Heschl's gyrus, lingual gyrus, and the temporal pole.  
789 Occipital regions generally decreased with age in surface areas and volumes, and increased with  
790 age in mean thicknesses, while parietal regions mainly decreased with age across cerebral  
791 measures.

792 Our findings additionally shed a light on the inconsistent age-related changes reported in  
793 motor, somatosensory, and visual cortices (Hogstrom et al., 2013; for review McGinnis et al.,  
794 2011). In terms of motor and somatosensory cortices, we found the largest surface area expansions  
795 in the paracentral lobule and sulcus and the precentral and postcentral gyrus (motor and  
796 somatosensory cortices) and a reduction of a similar size in these regions with age in terms of  
797 mean thicknesses and volumes. As for the visual cortices, the largest mean thickness expansions  
798 with age occurred in the cuneus gyrus, the lingual gyrus, occipital pole, the inferior, middle, and

Abbreviations: Total Cerebral Measures (TCMs): Total Brain Volume (TBV), Total Mean 33  
Cortical Thickness (MCT), or Total Surface Area (TSA). Grey Matter Volume (GMV).  
White Matter Volume (WMV).

799 superior, occipital gyri. The surface areas of these regions generally decreased with age and their  
800 volumes were either unaffected by age or showed a slight increase with age.  
801

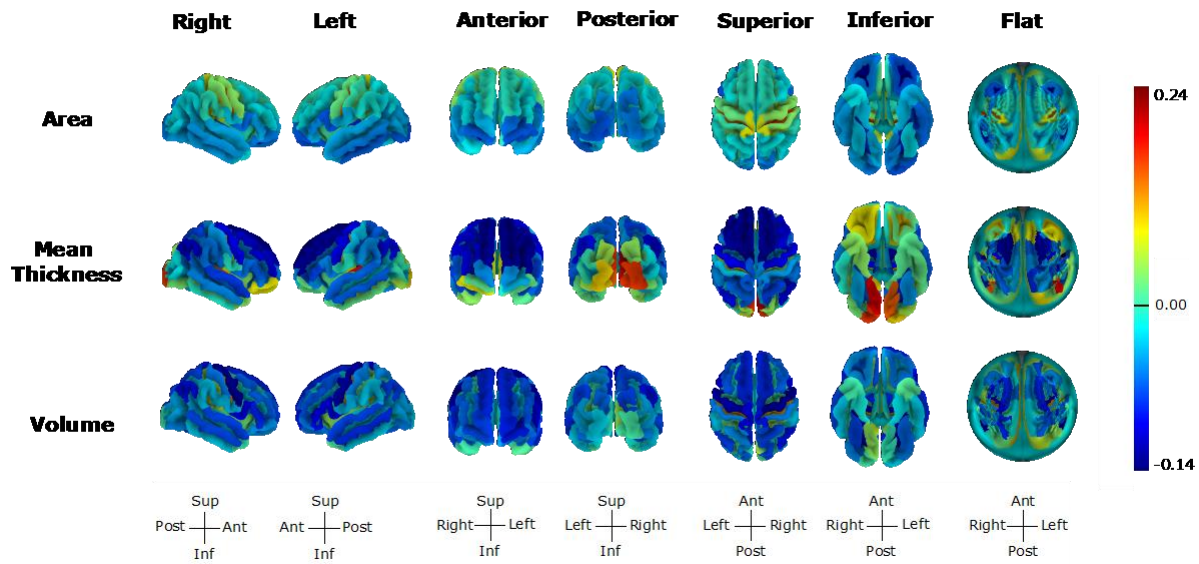

802

803 **Figure 3. Linear Age Effects across Cortical Measures.** Age effects ranged from -0.40 (mean  
804 thickness of the right inferior segment of the circular sulcus of the insula) to 0.22 (mean  
805 thickness of the right cuneus gyrus, O6). The flat representation corresponds to the flattened  
806 image of the superior view with the midline of the circle reflecting regions within the sagittal  
807 plane and circle edges reflecting inferior regions. Figures made with  
808 <https://neuroanatomy.github.io/cortex/> (Toro, 2020).

### 809 3.3.5 Conclusion of Age Effects

810 We observed a linear change with age in 76% (480/629) and a quadratic one in 25%  
811 (159/629) of regional cerebral measures. About 49% of regions decreased with linear age and 28%  
812 increased with linear age. Regions showing quadratic age effects typically showed linear age  
813 effects. A sex by age interaction was observed for regional measures in 14% of regions (87/629),  
814 ranging from -0.16 (right cerebellar lobule X) to 0.19 (left fimbria). For detailed results on the  
815 ASEG and Freesurfer subsegmentations linear and quadratic age effects, see Supplemental Info  
816 5.3 and for detailed results and a discussion of the sex by age and sex by age<sup>2</sup> interactions see  
817 Supplemental Info 5.4.

### 818 3.4. Does Brain Allometry Influence Reported Results?

819 We examined the effects of omitting brain allometry and adjusting for TCM with different  
820 methods. To do so, we compared the number of significant results from our main analyses obtained  
821 with the allometric TCM adjustment to those obtained when using the linear covariate or  
822 proportion TCM adjustment. The models with the linear covariate TCM adjustment yielded similar  
823 significant effects and interactions (i.e., age and sex effects and their interactions with and without  
824 TCM) to the allometric models: The linear covariate model under- or overestimated effects in  
825 2.35% (102/4340) of statistical tests and these differences occurred in regions near significance  
826 with small effect sizes (Supplemental Figures File 3 and 4,  
827 [https://osf.io/s4qc5/?view\\_only=bb067d96d0df4ae4902f99747d60e828](https://osf.io/s4qc5/?view_only=bb067d96d0df4ae4902f99747d60e828)). In contrast, the  
828 proportion adjustment for TCM overestimated 14.24% (618/4340) of effects and interactions  
829 reported in our main analyses compared to the allometric TCM adjustment (see Supplemental Info  
830 6.2.1 and Supplemental Table F1 for details). In our replication of the FIRST subcortical and  
831 Desikan-Killiany Cortical sex differences reported by Ritchie and colleagues (2018), the models  
832 with the linear covariate and the allometric approach additionally yielded consistent results, except  
833 for the sex differences of the left transverse temporal and the left pars opercularis volumes ( $\beta=0.02$   
834 for both), which only reached significance in the allometric model. Finally, based on our  
835 correlational analyses of a region's deviance from isometry (i.e.,  $|1 - \text{scaling coefficient}|$ ) and the  
836 difference in the effect size of a term between models with varying TCM adjustments (e.g.,  
837  $|\text{Proportion Sex } \beta - \text{Allometric Sex } \beta|$ ), we found that discrepancies in significance between the  
838 linear and allometric models were accentuated in more allometric regions, specifically for the

839 proportion models (see Supplemental Info 6.2.3, Supplemental Tables F5, and Supplemental  
840 Figures File 5 [https://osf.io/s4qc5/?view\\_only=bb067d96d0df4ae4902f99747d60e828](https://osf.io/s4qc5/?view_only=bb067d96d0df4ae4902f99747d60e828)).

841 Sex differences in variance differed in 38.06% (236/620) of regions between the allometric  
842 and the linear covariate approach and in 29.03% (180/620) of regions between the allometric and  
843 the proportion approach. These discrepancies additionally lead to a change in the direction of the  
844 correlation between a region's sex effect standardized beta and variance ratio. When adjusting for  
845 TCM with the proportion or the linear covariate approach, regions that were larger in males became  
846 more variable in males, instead of being more variable in females (see Supplemental Info 6.2.2  
847 and Supplemental Tables F2-4). We found a similar change in the direction of the correlations  
848 between the sex effect Cohen's *d* and variance ratios in our replication of Ritchie and colleagues'  
849 (2018) study with the cortical Desikan-Killiany and subcortical FIRST segmentations  
850 (Supplemental Table G10).

851 In line with previous research, we find more consistent results between the linear covariate  
852 and allometric approach compared to the proportion and allometric approach (Mankiw et al., 2017;  
853 Reardon et al., 2016; Sanchis-Segura et al., 2019). Our findings additionally suggest that the major  
854 source of variation in mean results across models with differing TCM adjustments is due to the  
855 omission of the intercept of the relationship between a region and its TCM (as in the proportion  
856 method) rather than the omission of its non-linear relationship (as in the proportion and linear  
857 covariate methods). Moreover, as the first study to examine the effects of omitting brain allometry  
858 on sex differences in variance, we find that omitting brain allometry leads to over or  
859 underestimating sex differences in variance depending on the region. Therefore, we suggest that  
860 brain allometry generally be considered to provide unbiased estimates of age, sex, and TBV effects  
861 and interactions across all brain regions, and stress that previous reported sex differences in  
862 variance relative to brain size be reexamined with brain allometry (Ritchie et al., 2018; Wierenga  
863 et al., n.d., 2018, 2019).

### 864 865 3.5 Neuroanatomical Norms

866 Neuroanatomical norms were generated for 40 028 UK Biobank participants at two levels:  
867 for global brain measures (total cerebral and cerebellar GM and WM volumes, TSA, Total MCT,  
868 and total subcortical and brainstem volumes) relative to TBV, and for each regional measure  
869 relative to its corresponding TCM (i.e., TBV, TSA, or Total MCT). These norms correspond to

Abbreviations: Total Cerebral Measures (TCMs): Total Brain Volume (TBV), Total Mean 36  
Cortical Thickness (MCT), or Total Surface Area (TSA). Grey Matter Volume (GMV).  
White Matter Volume (WMV).

870 the residuals from the full statistical models and reflect the extent to which the cerebral measures  
871 of an individual deviates from other individuals of the same sex, age, and total brain size. In  
872 addition to creating global and regional neuroanatomical norms for each of the 629 brain measures,  
873 we computed global neuroanatomical deviance markers, which reflect the deviance of an  
874 individual from the norm across all brain regions. This was done separately for volumes, surfaces  
875 and thicknesses, as well as across the three types of measures.

876 An individual with a “normal” brain - where all regional measures are at the expected value  
877 given this individual’s sex, age, and total cerebral size - should have a global neuroanatomical  
878 deviance of 0 for volume, surface and thickness. However, values ranged from 0.57 to 1.53 for  
879 volumes, 0.02 to 0.05 for mean thicknesses, and 0.04 to 0.13 for surface areas, suggesting that it  
880 is ‘normal’ to deviate from the cerebral norms (Table 3). In turn, individuals with a global  
881 neuroanatomical deviance above the mean had brain regions that deviated from the regional norms  
882 more than most individuals, while values below the mean represent reduced deviance from the  
883 neuroanatomical norm.

884 The means of the volumetric, surface area, and neuroanatomical (all cerebral measures  
885 combined) global neuroanatomical deviance were larger in males, suggesting that male volumes  
886 and surface areas deviated more from their sex-specific norm than females. However, females  
887 deviated more from their norm in the mean thickness global allometry marker. Males additionally  
888 had a more variable volumetric and neuroanatomical global allometric markers (Table 3, Figure  
889 4). Thus, investigations of global as well as regional neuroanatomical deviance should always take  
890 sex into account.

891

892 Table 3. Mean and Variance Sex Differences in across Global Deviance Markers

| Global Deviance Markers for | Min   | Max  | Male  |      | Female |      | d    | p        | VR   | p        |
|-----------------------------|-------|------|-------|------|--------|------|------|----------|------|----------|
|                             |       |      | $\mu$ | SD   | $\mu$  | SD   |      |          |      |          |
| Volumes                     | 0.57  | 1.53 | 0.85  | 0.96 | 0.82   | 0.92 | 0.27 | 2.20E-16 | 0.95 | 1.56E-12 |
| Mean Thicknesses            | 0.02  | 0.05 | 0.03  | 0.04 | 0.03   | 0.04 | 0.13 | 2.20E-16 | 1.00 | 0.712    |
| Surface Areas               | 0.04  | 0.13 | 0.07  | 0.01 | 0.07   | 0.01 | 0.12 | 2.20E-16 | 0.98 | 0.027    |
| All Measures                | -2.14 | 4.74 | 0.05  | 0.74 | -0.04  | 0.71 | 0.12 | 2.20E-16 | 0.97 | 1.12E-14 |

893  
894 *N.B.* d: Cohen's d. the Global Volumes, Mean Thicknesses, and Surface Areas Deviance Markers  
895 are calculated from equation X and the Global Neuroanatomical Deviance Marker (All Measures)  
896 corresponds to the average of the Z-score of the 3 Global Deviance Markers. Significance set to  
897 0.05/6, as 6 tests were performed. Global volumetric deviance was positively correlated with  
898 global surface area deviance ( $r = 0.35$ ,  $p < 2.2e-16$ ) and global mean thickness deviance ( $r = 0.33$ ,  
899  $p < 2.2e-16$ ). Global surface deviance and global mean thickness deviance were also positively  
900 correlated ( $r = 0.17$ ,  $p < 2.2e-16$ ).  
901

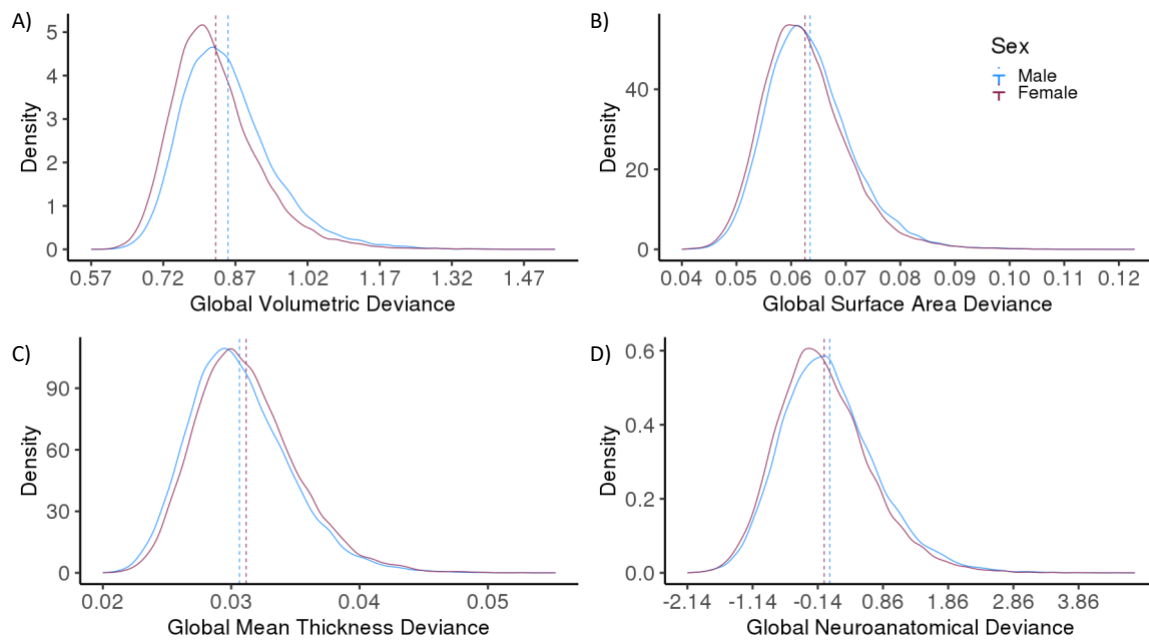

902  
903 **Figure 4.** Sex Differences in Global Neuroanatomical Deviances across Volumes (A), Cortical  
904 Surface Areas (B), Cortical Mean Thicknesses (C), and all Volumes, Cortical Surface Areas, and  
905 Cortical Mean Thicknesses(D). Mean (dashed lines) differences were found across measures,  
906 while variance differed between sexes only across volumes. Global Allometry marker corresponds  
907 to the square root of the sum of squared residuals divided by the number of regions for that measure  
908 from the model with age, total brain volume, and sex as well as age<sup>2</sup>, total brain volume, and sex  
909 interactions. Global Neuroanatomical Deviance Marker corresponds to the average of the Z-score  
910 of the 3 Global Deviance Markers. Significance set to 0.05/6, as 6 tests were performed.  
911

912           With the world’s largest neuroimaging dataset, we created neuroanatomical norms in the  
913 UK Biobank, to which any UK Biobank individual can be compared, in the same way that scores  
914 from intelligence tests or personality questionnaires can be compared to population norms. With  
915 these norms, future UK Biobank studies will be able to examine whether individuals that deviate  
916 from the norm on a global or regional brain measure also deviate from the norm in terms of  
917 cognitive and behavioral traits or of risk for neurological and psychiatric disorders. Having brain  
918 markers that are relative to total cerebral measures (rather than raw measures) will make it easier  
919 to distinguish the specific contribution of each regional brain measure from that of more global  
920 brain measures. As for global neuroanatomical deviance markers, future studies will be able to  
921 investigate the extent to which global neuroanatomical deviance reflects disruptions of brain  
922 development or serves as a risk factor for neurodevelopmental or psychiatric disorders. For studies  
923 examining the associations of specific regional brain measures with cognitive phenotypes, it may  
924 be useful to adjust on global neuroanatomical deviance, on top of total brain size, in order to fully  
925 dissociate regional from global effects.



## 926 3.6 Limitations

927 In light of the “healthy volunteer” selection bias and older age range of the UK Biobank  
928 (Fry et al., 2017), the present paper is limited in its capacity to generalize its findings and  
929 neuroanatomical norms and markers to other age groups or to the UK population. Moreover,  
930 created these norms and markers are not independent of ethnicity or highest level of education  
931 attained, factors thought to influence neuroanatomical measures (Shen et al., 2017; Tang et al.,  
932 2018). However, this enables future studies to investigate whether the present neuroanatomical  
933 markers vary as a function of ethnicity and level of education. If the aim is to generalize these  
934 findings to the UK population, we suggest that neuroanatomical markers be created with a  
935 representative sample or that weights be used to adjust the phenotypic measures of the UK Biobank  
936 to match those of the UK population.

937 While numerous studies focus on developing machine learning algorithms (e.g., SVM  
938 classifications) to generate neuroanatomical markers, we were interested in identifying sex, age,  
939 and TCM effects while considering their potential interactions, which are often omitted in the  
940 literature. By opting for a regression approach, we were able to quantify effects and interactions  
941 for each region, which would have been lost with machine learning. Future studies would  
942 nevertheless benefit from examining the age, sex, and global brain effects of other anatomical  
943 measures, such as diffusion tractography, and functional measures in the UK Biobank.

944 While the present study modelled age as a linear and quadratic function, other studies  
945 examining sex and age interactions used the nonparametric local smoothing technique (i.e.,  
946 smoothing splines; Fjell et al., 2013; Vinke et al., 2018), which are thought to be more predictive  
947 of individual trajectories and less vulnerable to sampling range (Fjell & Walhovd, 2010). However,  
948 this nonparametric approach also requires researchers to make more decisions that contribute to  
949 the variability of results. For instance, Fjell and colleagues (2010) initially selected the spline  
950 smoothing level that minimized the AIC, but when the absence of smoothing (which is equivalent  
951 to the linear least square model) yielded the smallest AIC for the sample of individuals over 60  
952 years old, they chose the smoothing level that minimized the BIC. Considering that the  
953 nonparametric local smoothing technique depends on selected parameters and that splines are  
954 difficult to interpret if we are interested in quantifying the magnitude of age effects, quadratic age  
955 was used instead of splines to model non-linear age in the present study.

956        **4. Conclusion**

957            The present study is the largest analysis to date of the age, sex, and TCM effects and  
958 interactions on global and regional brain volumes, cortical mean thicknesses, and cortical surface  
959 areas. We provide further evidence that brain allometry is a common property of the brain that  
960 should be considered to report unbiased estimates of age, sex, and TCM effects and interactions.  
961 By generating volumetric and allometric norms in the UK Biobank, we pave the way for future  
962 research to examine the associations between these markers and the behavioral and cognitive traits  
963 available in the UK Biobank. Once associations between these UK Biobank neuroanatomical  
964 norms and cognitive and behavioral measures are established, researchers will be able to examine  
965 the extent to which these neuroanatomical markers mediate the effect that genes and the  
966 environment have on these traits. This line of research will play critical role in our understanding  
967 of the influence that neuroanatomy has on who we are.  
968

969        **5. References**

- 970    Alfaro-Almagro, F., Jenkinson, M., Bangerter, N. K., Andersson, J. L. R., Griffanti, L., Douaud,  
971        G., Sotiropoulos, S. N., Jbabdi, S., Hernandez-Fernandez, M., Vallee, E., Vidaurre, D.,  
972        Webster, M., McCarthy, P., Rorden, C., Daducci, A., Alexander, D. C., Zhang, H.,  
973        Dragonu, I., Matthews, P. M., ... Smith, S. M. (2018). Image processing and Quality  
974        Control for the first 10,000 brain imaging datasets from UK Biobank. *NeuroImage*, *166*,  
975        400–424. <https://doi.org/10.1016/j.neuroimage.2017.10.034>
- 976    Beam, C. R., Kaneshiro, C., Jang, J. Y., Reynolds, C. A., Pedersen, N. L., & Gatz, M. (2018).  
977        Differences Between Women and Men in Incidence Rates of Dementia and Alzheimer’s  
978        Disease. *Journal of Alzheimer’s Disease : JAD*, *64*(4), 1077–1083.  
979        <https://doi.org/10.3233/JAD-180141>
- 980    Beck, A. T., Steer, R. A., & Brown, G. (1996). Beck depression inventory–II. *Psychological*  
981        *Assessment*.
- 982    Bernard, J. A., & Seidler, R. D. (2013). Relationships Between Regional Cerebellar Volume and  
983        Sensorimotor and Cognitive Function in Young and Older Adults. *The Cerebellum*,  
984        *12*(5), 721–737. <https://doi.org/10.1007/s12311-013-0481-z>
- 985    Boyd, A., Van de Velde, S., Vilagut, G., de Graaf, R., O’Neill, S., Florescu, S., Alonso, J., &  
986        Kovess-Masfety, V. (2015). Gender differences in mental disorders and suicidality in  
987        Europe: Results from a large cross-sectional population-based study. *Journal of Affective*  
988        *Disorders*, *173*, 245–254. <https://doi.org/10.1016/j.jad.2014.11.002>
- 989    Branch, C. L., Sonnenberg, B. R., Pitera, A. M., Benedict, L. M., Kozlovsky, D. Y., Bridge, E.  
990        S., & Pravosudov, V. V. (2020). Testing the greater male variability phenomenon: Male  
991        mountain chickadees exhibit larger variation in reversal learning performance compared  
992        with females. *Proceedings of the Royal Society B: Biological Sciences*, *287*(1931),  
993        20200895. <https://doi.org/10.1098/rspb.2020.0895>
- 994    Carass, A., Cuzzocreo, J. L., Han, S., Hernandez-Castillo, C. R., Rasser, P. E., Ganz, M.,  
995        Beliveau, V., Dolz, J., Ayed, I. B., Desrosiers, C., Thyreau, B., Romero, J. E., Coupé, P.,  
996        Manjón, J. V., Fonov, V. S., Collins, D. L., Ying, S. H., Onyike, C. U., Crocetti, D., ...  
997        Prince, J. L. (2018). Comparing fully automated state-of-the-art cerebellum parcellation

- 998 from magnetic resonance images. *NeuroImage*, 183, 150–172.  
999 <https://doi.org/10.1016/j.neuroimage.2018.08.003>
- 1000 Chen, X., Sachdev, P. S., Wen, W., & Anstey, K. J. (2007). Sex differences in regional gray  
1001 matter in healthy individuals aged 44–48 years: A voxel-based morphometric study.  
1002 *NeuroImage*, 36(3), 691–699. <https://doi.org/10.1016/j.neuroimage.2007.03.063>
- 1003 Costa Jr., P. T., & McCrae, R. R. (2008). The Revised NEO Personality Inventory (NEO-PI-R).  
1004 In *The SAGE handbook of personality theory and assessment, Vol 2: Personality*  
1005 *measurement and testing* (pp. 179–198). Sage Publications, Inc.  
1006 <https://doi.org/10.4135/9781849200479.n9>
- 1007 Cox, Simon R., Bastin, M. E., Ritchie, S. J., Dickie, D. A., Liewald, D. C., Muñoz Maniega, S.,  
1008 Redmond, P., Royle, N. A., Pattie, A., Valdés Hernández, M., Corley, J., Aribisala, B. S.,  
1009 McIntosh, A. M., Wardlaw, J. M., & Deary, I. J. (2018). Brain cortical characteristics of  
1010 lifetime cognitive ageing. *Brain Structure and Function*, 223(1), 509–518.  
1011 <https://doi.org/10.1007/s00429-017-1505-0>
- 1012 Cox, S.R., Ritchie, S. J., Fawns-Ritchie, C., Tucker-Drob, E. M., & Deary, I. J. (2019). Structural  
1013 brain imaging correlates of general intelligence in UK Biobank. *Intelligence*, 76.  
1014 <https://doi.org/10.1016/j.intell.2019.101376>
- 1015 Dallaire-Thérroux, C., Callahan, B. L., Potvin, O., Saikali, S., & Duchesne, S. (2017).  
1016 Radiological-Pathological Correlation in Alzheimer’s Disease: Systematic Review of  
1017 Antemortem Magnetic Resonance Imaging Findings. *Journal of Alzheimer’s Disease*,  
1018 57(2), 575–601. <https://doi.org/10.3233/JAD-161028>
- 1019 Deary, I. J. (2010). Cognitive epidemiology: Its rise, its current issues, and its challenges.  
1020 *Personality and Individual Differences*, 49(4), 337–343.  
1021 <https://doi.org/10.1016/j.paid.2009.11.012>
- 1022 DeCasien, A. R., Sherwood, C. C., Schapiro, S. J., & Higham, J. P. (2020). Greater variability in  
1023 chimpanzee (*Pan troglodytes*) brain structure among males. *Proceedings of the Royal*  
1024 *Society B: Biological Sciences*, 287(1925), 20192858.  
1025 <https://doi.org/10.1098/rspb.2019.2858>
- 1026 Diedrichsen, J., Balsters, J. H., Flavell, J., Cussans, E., & Ramnani, N. (2009). A probabilistic  
1027 MR atlas of the human cerebellum. *NeuroImage*, 46(1), 39–46.  
1028 <https://doi.org/10.1016/j.neuroimage.2009.01.045>

Abbreviations: Total Cerebral Measures (TCMs): Total Brain Volume (TBV), Total Mean Cortical Thickness (MCT), or Total Surface Area (TSA). Grey Matter Volume (GMV). White Matter Volume (WMV). 44

- 1029 Ellis, H. (1894). The Variational Tendency of Men. In *Man and woman: A study of human*  
1030 *secondary sexual characters* (1st ed., pp. 358–372). Walter. Scott.  
1031 <https://archive.org/details/manandwomanastu00elligoog/page/n16/mode/2up>
- 1032 Finlay, B. L., Darlington, R. B., & Nicastro, N. (2001). Developmental structure in brain  
1033 evolution. *The Behavioral and Brain Sciences*, 24(2), 263–278; discussion 278-308.  
1034 <https://doi.org/10.1017/S0140525X01003958>
- 1035 Fish, A. M., Cachia, A., Fischer, C., Mankiw, C., Reardon, P. K., Clasen, L. S., Blumenthal, J.  
1036 D., Greenstein, D., Giedd, J. N., Mangin, J.-F., & Raznahan, A. (2017). Influences of  
1037 Brain Size, Sex, and Sex Chromosome Complement on the Architecture of Human  
1038 Cortical Folding. *Cerebral Cortex (New York, N.Y.: 1991)*, 27(12), 5557–5567.  
1039 <https://doi.org/10.1093/cercor/bhw323>
- 1040 Fiske, A., Wetherell, J. L., & Gatz, M. (2009). Depression in Older Adults. *Annual Review of*  
1041 *Clinical Psychology*, 5(1), 363–389.  
1042 <https://doi.org/10.1146/annurev.clinpsy.032408.153621>
- 1043 Fjell, A. M., & Walhovd, K. B. (2010). Structural brain changes in aging: Courses, causes and  
1044 cognitive consequences. *Reviews in the Neurosciences*, 21(3), 187–221.  
1045 <https://doi.org/10.1515/revneuro.2010.21.3.187>
- 1046 Fjell, A. M., Westlye, L. T., Amlien, I., Espeseth, T., Reinvang, I., Raz, N., Agartz, I., Salat, D.  
1047 H., Greve, D. N., Fischl, B., Dale, A. M., & Walhovd, K. B. (2009). Minute effects of sex  
1048 on the aging brain: A multisample magnetic resonance imaging study of healthy aging  
1049 and Alzheimer’s disease. *The Journal of Neuroscience: The Official Journal of the*  
1050 *Society for Neuroscience*, 29(27), 8774–8783.  
1051 <https://doi.org/10.1523/JNEUROSCI.0115-09.2009>
- 1052 Fjell, A. M., Westlye, L. T., Grydeland, H., Amlien, I., Espeseth, T., Reinvang, I., Raz, N.,  
1053 Holland, D., Dale, A. M., & Walhovd, K. B. (2013). Critical ages in the life course of the  
1054 adult brain: Nonlinear subcortical aging. *Neurobiology of Aging*, 34(10), 2239–2247.  
1055 <https://doi.org/10.1016/j.neurobiolaging.2013.04.006>
- 1056 Fox, J., Weisberg, S., Price, B., Adler, D., Bates, D., Baud-Bovy, G., Bolker, B., Ellison, S.,  
1057 Firth, D., Friendly, M., Gorjanc, G., Graves, S., Heiberger, R., Krivitsky, P., Laboissiere,  
1058 R., Maechler, M., Monette, G., Murdoch, D., Nilsson, H., ... R-Core. (2020). *car*:

- 1059 *Companion to Applied Regression* (3.0-10) [Computer software]. [https://CRAN.R-](https://CRAN.R-project.org/package=car)  
1060 [project.org/package=car](https://CRAN.R-project.org/package=car)
- 1061 Fry, A., Littlejohns, T. J., Sudlow, C., Doherty, N., Adamska, L., Sprosen, T., Collins, R., &  
1062 Allen, N. E. (2017). Comparison of Sociodemographic and Health-Related  
1063 Characteristics of UK Biobank Participants With Those of the General Population.  
1064 *American Journal of Epidemiology*, *186*(9), 1026–1034.  
1065 <https://doi.org/10.1093/aje/kwx246>
- 1066 Gong, Q., Scarpazza, C., Dai, J., He, M., Xu, X., Shi, Y., Zhou, B., Vieira, S., McCrory, E., Ai,  
1067 Y., Yang, C., Zhang, F., Lui, S., & Mechelli, A. (2019). A transdiagnostic  
1068 neuroanatomical signature of psychiatric illness. *Neuropsychopharmacology*, *44*(5), 869–  
1069 875. <https://doi.org/10.1038/s41386-018-0175-9>
- 1070 Gur, R. C., Turetsky, B. I., Matsui, M., Yan, M., Bilker, W., Hughett, P., & Gur, R. E. (1999).  
1071 Sex Differences in Brain Gray and White Matter in Healthy Young Adults: Correlations  
1072 with Cognitive Performance. *Journal of Neuroscience*, *19*(10), 4065–4072.  
1073 <https://doi.org/10.1523/JNEUROSCI.19-10-04065.1999>
- 1074 Han, L., Chen, L., Bin, Y., Cun, D., Yu-chen, H., & Xin, J. (2019). Deep Feature Combination  
1075 Based Multi-Model Wind Power Prediction. *2019 IEEE 2nd International Conference on*  
1076 *Computer and Communication Engineering Technology (CCET)*, 143–148.  
1077 <https://doi.org/10.1109/CCET48361.2019.8989358>
- 1078 Han, S., An, Y., Carass, A., Prince, J. L., & Resnick, S. M. (2020). Longitudinal Analysis of  
1079 Regional Cerebellum Volumes During Normal Aging. *NeuroImage*, 117062.  
1080 <https://doi.org/10.1016/j.neuroimage.2020.117062>
- 1081 Han, S., Carass, A., He, Y., & Prince, J. L. (2020). Automatic cerebellum anatomical  
1082 parcellation using U-Net with locally constrained optimization. *NeuroImage*, *218*,  
1083 116819. <https://doi.org/10.1016/j.neuroimage.2020.116819>
- 1084 Hogstrom, L. J., Westlye, L. T., Walhovd, K. B., & Fjell, A. M. (2013). The Structure of the  
1085 Cerebral Cortex Across Adult Life: Age-Related Patterns of Surface Area, Thickness,  
1086 and Gyrfication. *Cerebral Cortex*, *23*(11), 2521–2530.  
1087 <https://doi.org/10.1093/cercor/bhs231>
- 1088 Hoogendam, Y. Y., van der Geest, J. N., van der Lijn, F., van der Lugt, A., Niessen, W. J.,  
1089 Krestin, G. P., Hofman, A., Vernooij, M. W., Breteler, M. M. B., & Ikram, M. A. (2012).

Abbreviations: Total Cerebral Measures (TCMs): Total Brain Volume (TBV), Total Mean 46  
Cortical Thickness (MCT), or Total Surface Area (TSA). Grey Matter Volume (GMV).  
White Matter Volume (WMV).

- 1090 Determinants of cerebellar and cerebral volume in the general elderly population.  
1091 *Neurobiology of Aging*, 33(12), 2774–2781.  
1092 <https://doi.org/10.1016/j.neurobiolaging.2012.02.012>
- 1093 Hurtz, S., Woo, E., Kebets, V., Green, A. E., Zoumalan, C., Wang, B., Ringman, J. M.,  
1094 Thompson, P. M., & Apostolova, L. G. (2014). Age Effects on Cortical Thickness in  
1095 Cognitively Normal Elderly Individuals. *Dementia and Geriatric Cognitive Disorders*  
1096 *EXTRA*, 4(2), 221–227. <https://doi.org/10.1159/000362872>
- 1097 Im, K., Lee, J.-M., Lyttelton, O., Kim, S. H., Evans, A. C., & Kim, S. I. (2008). Brain Size and  
1098 Cortical Structure in the Adult Human Brain. *Cerebral Cortex*, 18(9), 2181–2191.  
1099 <https://doi.org/10.1093/cercor/bhm244>
- 1100 Jäncke, L., Liem, F., & Merillat, S. (2019). Scaling of brain compartments to brain size.  
1101 *Neuroreport*, 30(8), 573–579. <https://doi.org/10.1097/WNR.0000000000001249>
- 1102 Jäncke, L., Mérrillat, S., Liem, F., & Hänggi, J. (2015a). Brain size, sex, and the aging brain.  
1103 *Human Brain Mapping*, 36(1), 150–169. <https://doi.org/10.1002/hbm.22619>
- 1104 Jäncke, L., Mérrillat, S., Liem, F., & Hänggi, J. (2015b). Brain size, sex, and the aging brain.  
1105 *Human Brain Mapping*, 36(1), 150–169. <https://doi.org/10.1002/hbm.22619>
- 1106 Jellinger, K. A., & Attems, J. (2015). Challenges of multimorbidity of the aging brain: A critical  
1107 update. *Journal of Neural Transmission (Vienna, Austria: 1996)*, 122(4), 505–521.  
1108 <https://doi.org/10.1007/s00702-014-1288-x>
- 1109 Johnson, W., Carothers, A., & Deary, I. J. (2008). Sex Differences in Variability in General  
1110 Intelligence: A New Look at the Old Question. *Perspectives on Psychological Science: A*  
1111 *Journal of the Association for Psychological Science*, 3(6), 518–531.  
1112 <https://doi.org/10.1111/j.1745-6924.2008.00096.x>
- 1113 Jong, L. W. de, Vidal, J.-S., Forsberg, L. E., Zijdenbos, A. P., Haight, T., Sigurdsson, S.,  
1114 Gudnason, V., Buchem, M. A. van, & Launer, L. J. (2017). Allometric scaling of brain  
1115 regions to intra-cranial volume: An epidemiological MRI study. *Human Brain Mapping*,  
1116 38(1), 151–164. <https://doi.org/10.1002/hbm.23351>
- 1117 Ju, C., Duan, Y., & You, X. (2015). Retesting the greater male variability hypothesis in mainland  
1118 China: A cross-regional study. *Personality and Individual Differences*, 72, 85–89.  
1119 <https://doi.org/10.1016/j.paid.2014.07.021>

- 1120 Jumah, F., Ghannam, M., Jaber, M., Adeeb, N., & Tubbs, R. S. (2016). Neuroanatomical  
1121 variation in autism spectrum disorder: A comprehensive review. *Clinical Anatomy*, 29(4),  
1122 454–465. <https://doi.org/10.1002/ca.22717>
- 1123 Kaczurkin, A. N., Raznahan, A., & Satterthwaite, T. D. (2019). Sex differences in the  
1124 developing brain: Insights from multimodal neuroimaging. *Neuropsychopharmacology: Official Publication of the American College of Neuropsychopharmacology*, 44(1), 71–  
1125 85. <https://doi.org/10.1038/s41386-018-0111-z>
- 1127 Karwowski, M., Jankowska, D. M., Gajda, A., Marczak, M., Groyecka, A., & Sorokowski, P.  
1128 (2016). Greater Male Variability in Creativity Outside the WEIRD World. *Creativity Research Journal*, 28(4), 467–470. <https://doi.org/10.1080/10400419.2016.1229978>
- 1129 Koppelmans, V., Hoogendam, Y. Y., Hirsiger, S., Mérillat, S., Jäncke, L., & Seidler, R. D.  
1130 (2017). Regional cerebellar volumetric correlates of manual motor and cognitive  
1131 function. *Brain Structure and Function*, 222(4), 1929–1944.  
1132 <https://doi.org/10.1007/s00429-016-1317-7>
- 1134 Kurth, F., Cherbuin, N., & Luders, E. (2017). The impact of aging on subregions of the  
1135 hippocampal complex in healthy adults. *NeuroImage*, 163, 296–300.  
1136 <https://doi.org/10.1016/j.neuroimage.2017.09.016>
- 1137 Lefebvre, A., Beggiano, A., Bourgeron, T., & Toro, R. (2015). Neuroanatomical Diversity of  
1138 Corpus Callosum and Brain Volume in Autism: Meta-analysis, Analysis of the Autism  
1139 Brain Imaging Data Exchange Project, and Simulation. *Biological Psychiatry*, 78(2),  
1140 126–134. <https://doi.org/10.1016/j.biopsych.2015.02.010>
- 1141 Lehre, A.-C., Lehre, K. P., Laake, P., & Danbolt, N. C. (2009). Greater intrasex phenotype  
1142 variability in males than in females is a fundamental aspect of the gender differences in  
1143 humans. *Developmental Psychobiology*, 51(2), 198–206.  
1144 <https://doi.org/10.1002/dev.20358>
- 1145 Lemaitre, H., Goldman, A., Sambataro, F., Verchinski, B., Meyer-Lindenberg, A., Weinberger,  
1146 D., & Mattay, V. (2012). Normal age-related brain morphometric changes:  
1147 Nonuniformity across cortical thickness, surface area and grey matter volume?  
1148 *Neurobiology of Aging*, 33(3), 617.e1-617.e9.  
1149 <https://doi.org/10.1016/j.neurobiolaging.2010.07.013>



- 1150 Liu, D., Johnson, H. J., Long, J. D., Magnotta, V. A., & Paulsen, J. S. (2014). The power-  
1151 proportion method for intracranial volume correction in volumetric imaging analysis.  
1152 *Frontiers in Neuroscience*, 8. <https://doi.org/10.3389/fnins.2014.00356>
- 1153 Long, X., Liao, W., Jiang, C., Liang, D., Qiu, B., & Zhang, L. (2012). Healthy Aging: An  
1154 Automatic Analysis of Global and Regional Morphological Alterations of Human Brain.  
1155 *Academic Radiology*, 19(7), 785–793. <https://doi.org/10.1016/j.acra.2012.03.006>
- 1156 Lotze, M., Domin, M., Gerlach, F. H., Gaser, C., Lueders, E., Schmidt, C. O., & Neumann, N.  
1157 (2019). Novel findings from 2,838 Adult Brains on Sex Differences in Gray Matter Brain  
1158 Volume. *Scientific Reports*, 9(1), 1671. <https://doi.org/10.1038/s41598-018-38239-2>
- 1159 Luders, E., Gaser, C., Narr, K. L., & Toga, A. W. (2009). Why Sex Matters: Brain Size  
1160 Independent Differences in Gray Matter Distributions between Men and Women. *The*  
1161 *Journal of Neuroscience*, 29(45), 14265–14270.  
1162 <https://doi.org/10.1523/JNEUROSCI.2261-09.2009>
- 1163 Malykhin, N. V., Huang, Y., Hrybouski, S., & Olsen, F. (2017). Differential vulnerability of  
1164 hippocampal subfields and anteroposterior hippocampal subregions in healthy cognitive  
1165 aging. *Neurobiology of Aging*, 59, 121–134.  
1166 <https://doi.org/10.1016/j.neurobiolaging.2017.08.001>
- 1167 Mankiw, C., Park, M. T. M., Reardon, P. K., Fish, A. M., Clasen, L. S., Greenstein, D., Giedd, J.  
1168 N., Blumenthal, J. D., Lerch, J. P., Chakravarty, M. M., & Raznahan, A. (2017).  
1169 Allometric Analysis Detects Brain Size-Independent Effects of Sex and Sex  
1170 Chromosome Complement on Human Cerebellar Organization. *The Journal of*  
1171 *Neuroscience*, 37(21), 5221–5231. <https://doi.org/10.1523/JNEUROSCI.2158-16.2017>
- 1172 Marek, S., Tervo-Clemmens, B., Calabro, F. J., Montez, D. F., Kay, B. P., Hatoum, A. S.,  
1173 Donohue, M. R., Foran, W., Miller, R. L., Feczko, E., Miranda-Dominguez, O., Graham,  
1174 A. M., Earl, E. A., Perrone, A. J., Cordova, M., Doyle, O., Moore, L. A., Conan, G.,  
1175 Uriarte, J., ... Dosenbach, N. U. F. (2020). Towards Reproducible Brain-Wide  
1176 Association Studies. *BioRxiv*, 2020.08.21.257758.  
1177 <https://doi.org/10.1101/2020.08.21.257758>
- 1178 Matsuo, K., Harada, K., Fujita, Y., Okamoto, Y., Ota, M., Narita, H., Mwangi, B., Gutierrez, C.  
1179 A., Okada, G., Takamura, M., Yamagata, H., Kusumi, I., Kunugi, H., Inoue, T., Soares, J.  
1180 C., Yamawaki, S., & Watanabe, Y. (2019). Distinctive Neuroanatomical Substrates for

Abbreviations: Total Cerebral Measures (TCMs): Total Brain Volume (TBV), Total Mean 49  
Cortical Thickness (MCT), or Total Surface Area (TSA). Grey Matter Volume (GMV).  
White Matter Volume (WMV).

- 1181 Depression in Bipolar Disorder versus Major Depressive Disorder. *Cerebral Cortex*,  
1182 29(1), 202–214. <https://doi.org/10.1093/cercor/bhx319>
- 1183 McGinnis, S. M., Brickhouse, M., Pascual, B., & Dickerson, B. C. (2011). Age-Related Changes  
1184 in the Thickness of Cortical Zones in Humans. *Brain Topography*, 24(3), 279.  
1185 <https://doi.org/10.1007/s10548-011-0198-6>
- 1186 Miller, K. L., Alfaro-Almagro, F., Bangerter, N. K., Thomas, D. L., Yacoub, E., Xu, J., Bartsch,  
1187 A. J., Jbabdi, S., Sotiropoulos, S. N., Andersson, J. L. R., Griffanti, L., Douaud, G.,  
1188 Okell, T. W., Weale, P., Dragonu, I., Garratt, S., Hudson, S., Collins, R., Jenkinson, M.,  
1189 ... Smith, S. M. (2016). Multimodal population brain imaging in the UK Biobank  
1190 prospective epidemiological study. *Nature Neuroscience*, 19(11), 1523–1536.  
1191 <https://doi.org/10.1038/nn.4393>
- 1192 Morey, R. A., Petty, C. M., Xu, Y., Hayes, J. P., Wagner, H. R., Lewis, D. V., LaBar, K. S.,  
1193 Styner, M., & McCarthy, G. (2009). A comparison of automated segmentation and  
1194 manual tracing for quantifying hippocampal and amygdala volumes. *NeuroImage*, 45(3),  
1195 855–866. <https://doi.org/10.1016/j.neuroimage.2008.12.033>
- 1196 Morey, R. A., Selgrade, E. S., Wagner, H. R., Huettel, S. A., Wang, L., & McCarthy, G. (2010).  
1197 Scan-rescan reliability of subcortical brain volumes derived from automated  
1198 segmentation. *Human Brain Mapping*, 31(11), 1751–1762.  
1199 <https://doi.org/10.1002/hbm.20973>
- 1200 Narvaca, K., Treit, S., Camicioli, R., Martin, W., & Beaulieu, C. (2017). Evolution of deep gray  
1201 matter volume across the human lifespan. *Human Brain Mapping*, 38(8), 3771–3790.  
1202 <https://doi.org/10.1002/hbm.23604>
- 1203 Nordenskjöld, R., Malmberg, F., Larsson, E.-M., Simmons, A., Ahlström, H., Johansson, L., &  
1204 Kullberg, J. (2015). Intracranial volume normalization methods: Considerations when  
1205 investigating gender differences in regional brain volume. *Psychiatry Research:*  
1206 *Neuroimaging*, 231(3), 227–235. <https://doi.org/10.1016/j.psychresns.2014.11.011>
- 1207 Oakes, P., Loukas, M., Oskouian, R. J., & Tubbs, R. S. (2017). The neuroanatomy of depression:  
1208 A review. *Clinical Anatomy*, 30(1), 44–49. <https://doi.org/10.1002/ca.22781>
- 1209 O'Brien, L. M., Ziegler, D. A., Deutsch, C. K., Frazier, J. A., Herbert, M. R., & Locascio, J. J.  
1210 (2011). Statistical adjustments for brain size in volumetric neuroimaging studies: Some

- 1211 practical implications in methods. *Psychiatry Research*, 193(2), 113–122.  
1212 <https://doi.org/10.1016/j.psychresns.2011.01.007>
- 1213 O'Brien, L. M., Ziegler, D. A., Deutsch, C. K., Kennedy, D. N., Goldstein, J. M., Seidman, L. J.,  
1214 Hodge, S., Makris, N., Caviness, V., Frazier, J. A., & Herbert, M. R. (2006). Adjustment  
1215 for whole brain and cranial size in volumetric brain studies: A review of common  
1216 adjustment factors and statistical methods. *Harvard Review of Psychiatry*, 14(3), 141–  
1217 151. <https://doi.org/10.1080/10673220600784119>
- 1218 Peyre, H., Mohanpuria, N., Jednoróg, K., Heim, S., Grande, M., Ermingen-Marbach, M. van,  
1219 Altarelli, I., Monzalvo, K., Williams, C. M., Germanaud, D., Toro, R., & Ramus, F.  
1220 (2020). Neuroanatomy of dyslexia: An allometric approach. *European Journal of*  
1221 *Neuroscience*, n/a(n/a). <https://doi.org/10.1111/ejn.14690>
- 1222 Pintzka, C. W. S., Hansen, T. I., Evensmoen, H. R., & Håberg, A. K. (2015). Marked effects of  
1223 intracranial volume correction methods on sex differences in neuroanatomical structures:  
1224 A HUNT MRI study. *Frontiers in Neuroscience*, 9, 238.  
1225 <https://doi.org/10.3389/fnins.2015.00238>
- 1226 R Core Team. (2019). *R: A Language and Environment for Statistical Computing*. R Foundation  
1227 for Statistical Computing. <https://www.R-project.org/>
- 1228 Ramus, F., Altarelli, I., Jednoróg, K., Zhao, J., & Scotto di Covella, L. (2018). Neuroanatomy of  
1229 developmental dyslexia: Pitfalls and promise. *Neuroscience & Biobehavioral Reviews*,  
1230 84, 434–452. <https://doi.org/10.1016/j.neubiorev.2017.08.001>
- 1231 Raz, N., Lindenberger, U., Rodrigue, K. M., Kennedy, K. M., Head, D., Williamson, A., Dahle,  
1232 C., Gerstorff, D., & Acker, J. D. (2005). Regional Brain Changes in Aging Healthy  
1233 Adults: General Trends, Individual Differences and Modifiers. *Cerebral Cortex*, 15(11),  
1234 1676–1689. <https://doi.org/10.1093/cercor/bhi044>
- 1235 Reardon, P. K., Clasen, L., Giedd, J. N., Blumenthal, J., Lerch, J. P., Chakravarty, M. M., &  
1236 Raznahan, A. (2016). An Allometric Analysis of Sex and Sex Chromosome Dosage  
1237 Effects on Subcortical Anatomy in Humans. *The Journal of Neuroscience: The Official*  
1238 *Journal of the Society for Neuroscience*, 36(8), 2438–2448.  
1239 <https://doi.org/10.1523/JNEUROSCI.3195-15.2016>
- 1240 Reardon, P. K., Seidlitz, J., Vandekar, S., Liu, S., Patel, R., Park, M. T. M., Alexander-Bloch, A.,  
1241 Clasen, L. S., Blumenthal, J. D., Lalonde, F. M., Giedd, J. N., Gur, R. C., Gur, R. E.,

Abbreviations: Total Cerebral Measures (TCMs): Total Brain Volume (TBV), Total Mean Cortical Thickness (MCT), or Total Surface Area (TSA). Grey Matter Volume (GMV). White Matter Volume (WMV). 51

- 1242 Lerch, J. P., Chakravarty, M. M., Satterthwaite, T. D., Shinohara, R. T., & Raznahan, A.  
1243 (2018). Normative brain size variation and brain shape diversity in humans. *Science*,  
1244 *360*(6394), 1222–1227. <https://doi.org/10.1126/science.aar2578>
- 1245 Ritchie, S. J., Cox, S. R., Shen, X., Lombardo, M. V., Reus, L. M., Alloza, C., Harris, M. A.,  
1246 Alderson, H. L., Hunter, S., Neilson, E., Liewald, D. C. M., Auyeung, B., Whalley, H. C.,  
1247 Lawrie, S. M., Gale, C. R., Bastin, M. E., McIntosh, A. M., & Deary, I. J. (2018). Sex  
1248 Differences in the Adult Human Brain: Evidence from 5216 UK Biobank Participants.  
1249 *Cerebral Cortex*, *28*(8), 2959–2975. <https://doi.org/10.1093/cercor/bhy109>
- 1250 Ruigrok, A. N. V., Salimi-Khorshidi, G., Lai, M.-C., Baron-Cohen, S., Lombardo, M. V., Tait,  
1251 R. J., & Suckling, J. (2014). A meta-analysis of sex differences in human brain structure.  
1252 *Neuroscience & Biobehavioral Reviews*, *39*, 34–50.  
1253 <https://doi.org/10.1016/j.neubiorev.2013.12.004>
- 1254 Salat, D. H., Buckner, R. L., Snyder, A. Z., Greve, D. N., Desikan, R. S. R., Busa, E., Morris, J.  
1255 C., Dale, A. M., & Fischl, B. (2004). Thinning of the cerebral cortex in aging. *Cerebral*  
1256 *Cortex (New York, N.Y.: 1991)*, *14*(7), 721–730. <https://doi.org/10.1093/cercor/bhh032>
- 1257 Sanchis-Segura, C., Ibañez-Gual, M. V., Adrián-Ventura, J., Aguirre, N., Gómez-Cruz, Á. J.,  
1258 Avila, C., & Forn, C. (2019). Sex differences in gray matter volume: How many and how  
1259 large are they really? *Biology of Sex Differences*, *10*(1), 32.  
1260 <https://doi.org/10.1186/s13293-019-0245-7>
- 1261 Schmidt, C. K., Khalid, S., Loukas, M., & Tubbs, R. S. (2018). Neuroanatomy of Anxiety: A  
1262 Brief Review. *Cureus*, *10*(1), e2055–e2055. PubMed. <https://doi.org/10.7759/cureus.2055>
- 1263 Schoemaker, D., Buss, C., Head, K., Sandman, C. A., Davis, E. P., Chakravarty, M. M.,  
1264 Gauthier, S., & Pruessner, J. (2016). Hippocampus and amygdala volumes from  
1265 Magnetic Resonance Images in children: Assessing accuracy of Freesurfer and FSL  
1266 against manual segmentation. *NeuroImage*, *129*, 1–14.  
1267 <https://doi.org/10.1016/j.neuroimage.2016.01.038>
- 1268 Seedat, S., Scott, K. M., Angermeyer, M. C., Berglund, P., Bromet, E. J., Brugha, T. S.,  
1269 Demyttenaere, K., Girolamo, G. de, Haro, J. M., Jin, R., Karam, E. G., Kovess-Masfety,  
1270 V., Levinson, D., Mora, M. E. M., Ono, Y., Ormel, J., Pennell, B.-E., Posada-Villa, J.,  
1271 Sampson, N. A., ... Kessler, R. C. (2009). Cross-National Associations Between Gender  
1272 and Mental Disorders in the World Health Organization World Mental Health Surveys.

Abbreviations: Total Cerebral Measures (TCMs): Total Brain Volume (TBV), Total Mean Cortical Thickness (MCT), or Total Surface Area (TSA). Grey Matter Volume (GMV). White Matter Volume (WMV). 52

- 1273 *Archives of General Psychiatry*, 66(7), 785–795.
- 1274 <https://doi.org/10.1001/archgenpsychiatry.2009.36>
- 1275 Sele, S., Liem, F., Mérillat, S., & Jäncke, L. (2020). Decline Variability of Cortical and  
1276 Subcortical Regions in Aging: A Longitudinal Study. *Frontiers in Human Neuroscience*,  
1277 14. <https://doi.org/10.3389/fnhum.2020.00363>
- 1278 Shen, X., Reus, L. M., Cox, S. R., Adams, M. J., Liewald, D. C., Bastin, M. E., Smith, D. J.,  
1279 Deary, I. J., Whalley, H. C., & McIntosh, A. M. (2017). Subcortical volume and white  
1280 matter integrity abnormalities in major depressive disorder: Findings from UK Biobank  
1281 imaging data. *Scientific Reports*, 7(1), 5547. <https://doi.org/10.1038/s41598-017-05507-6>
- 1282 Storsve, A. B., Fjell, A. M., Tamnes, C. K., Westlye, L. T., Overbye, K., Aasland, H. W., &  
1283 Walhovd, K. B. (2014). Differential Longitudinal Changes in Cortical Thickness, Surface  
1284 Area and Volume across the Adult Life Span: Regions of Accelerating and Decelerating  
1285 Change. *The Journal of Neuroscience*, 34(25), 8488–8498.  
1286 <https://doi.org/10.1523/JNEUROSCI.0391-14.2014>
- 1287 Sudlow, C., Gallacher, J., Allen, N., Beral, V., Burton, P., Danesh, J., Downey, P., Elliott, P.,  
1288 Green, J., Landray, M., Liu, B., Matthews, P., Ong, G., Pell, J., Silman, A., Young, A.,  
1289 Sprosen, T., Peakman, T., & Collins, R. (2015). UK Biobank: An Open Access Resource  
1290 for Identifying the Causes of a Wide Range of Complex Diseases of Middle and Old Age.  
1291 *PLOS Medicine*, 12(3), e1001779. <https://doi.org/10.1371/journal.pmed.1001779>
- 1292 Szucs, D., & Ioannidis, J. P. A. (2017). When Null Hypothesis Significance Testing Is  
1293 Unsuitable for Research: A Reassessment. *Frontiers in Human Neuroscience*, 11.  
1294 <https://doi.org/10.3389/fnhum.2017.00390>
- 1295 Szucs, D., & Ioannidis, J. P. A. (2020). Sample size evolution in neuroimaging research: An  
1296 evaluation of highly-cited studies (1990–2012) and of latest practices (2017–2018) in  
1297 high-impact journals. *NeuroImage*, 221, 117164.  
1298 <https://doi.org/10.1016/j.neuroimage.2020.117164>
- 1299 Tan, A., Ma, W., Vira, A., Marwaha, D., & Eliot, L. (2016). The human hippocampus is not  
1300 sexually-dimorphic: Meta-analysis of structural MRI volumes. *NeuroImage*, 124(Pt A),  
1301 350–366. <https://doi.org/10.1016/j.neuroimage.2015.08.050>
- 1302 Tang, Y., Zhao, L., Lou, Y., Shi, Y., Fang, R., Lin, X., Liu, S., & Toga, A. (2018). Brain  
1303 structure differences between Chinese and Caucasian cohorts: A comprehensive

- 1304 morphometry study. *Human Brain Mapping*, 39(5), 2147–2155.  
1305 <https://doi.org/10.1002/hbm.23994>
- 1306 Toro, R. (2020). Cortical Figures Generator. <https://r03ert0.github.io/cortex/>
- 1307 Toro, R., Chupin, M., Garnero, L., Leonard, G., Perron, M., Pike, B., Pitiot, A., Richer, L.,  
1308 Veillette, S., Pausova, Z., & Paus, T. (2009). Brain volumes and Val66Met  
1309 polymorphism of the BDNF gene: Local or global effects? *Brain Structure & Function*,  
1310 213(6), 501–509. <https://doi.org/10.1007/s00429-009-0203-y>
- 1311 Toro, R., Perron, M., Pike, B., Richer, L., Veillette, S., Pausova, Z., & Paus, T. (2008). Brain  
1312 Size and Folding of the Human Cerebral Cortex. *Cerebral Cortex*, 18(10), 2352–2357.  
1313 <https://doi.org/10.1093/cercor/bhm261>
- 1314 van Velsen, E. F. S., Vernooij, M. W., Vrooman, H. A., van der Lugt, A., Breteler, M. M. B.,  
1315 Hofman, A., Niessen, W. J., & Ikram, M. A. (2013). Brain cortical thickness in the  
1316 general elderly population: The Rotterdam Scan Study. *Neuroscience Letters*, 550, 189–  
1317 194. <https://doi.org/10.1016/j.neulet.2013.06.063>
- 1318 Vinke, E. J., de Groot, M., Venkatraghavan, V., Klein, S., Niessen, W. J., Ikram, M. A., &  
1319 Vernooij, M. W. (2018). Trajectories of imaging markers in brain aging: The Rotterdam  
1320 Study. *Neurobiology of Aging*, 71, 32–40.  
1321 <https://doi.org/10.1016/j.neurobiolaging.2018.07.001>
- 1322 Wechsler, D., Psychological Corporation, & PsychCorp (Firm). (2008). *WAIS-IV technical and*  
1323 *interpretive manual*. Pearson.
- 1324 Wierenga, L. M., Bos, M. G. N., van Rossenberg, F., & Crone, E. A. (2019). Sex Effects on  
1325 Development of Brain Structure and Executive Functions: Greater Variance than Mean  
1326 Effects. *Journal of Cognitive Neuroscience*, 31(5), 730–753.  
1327 [https://doi.org/10.1162/jocn\\_a\\_01375](https://doi.org/10.1162/jocn_a_01375)
- 1328 Wierenga, L. M., Doucet, G. E., Dima, D., Agartz, I., Aghajani, M., Akudjedu, T. N., Albajes-  
1329 Eizagirre, A., Alnæs, D., Alpert, K. I., Andreassen, O. A., Anticevic, A., Asherson, P.,  
1330 Banaschewski, T., Bargallo, N., Baumeister, S., Baur-Streubel, R., Bertolino, A.,  
1331 Bonvino, A., Boomsma, D. I., ... Tamnes, C. K. (n.d.). Greater male than female  
1332 variability in regional brain structure across the lifespan. *Human Brain Mapping*,  
1333 *n/a(n/a)*. <https://doi.org/10.1002/hbm.25204>

- 1334 Wierenga, L. M., Langen, M., Ambrosino, S., van Dijk, S., Oranje, B., & Durston, S. (2014).  
1335 Typical development of basal ganglia, hippocampus, amygdala and cerebellum from age  
1336 7 to 24. *NeuroImage*, *96*, 67–72. <https://doi.org/10.1016/j.neuroimage.2014.03.072>
- 1337 Wierenga, L. M., Sexton, J. A., Laake, P., Giedd, J. N., Tamnes, C. K., & Pediatric Imaging,  
1338 Neurocognition, and Genetics Study. (2018). A Key Characteristic of Sex Differences in  
1339 the Developing Brain: Greater Variability in Brain Structure of Boys than Girls. *Cerebral*  
1340 *Cortex (New York, N.Y.: 1991)*, *28*(8), 2741–2751. <https://doi.org/10.1093/cercor/bhx154>
- 1341 Williams, C. M., Peyre, H., Toro, R., Beggiato, A., & Ramus, F. (2020). Adjusting for allometric  
1342 scaling in ABIDE I challenges subcortical volume differences in autism spectrum  
1343 disorder. *Human Brain Mapping*, *n/a*(n/a). <https://doi.org/10.1002/hbm.25145>
- 1344
- 1345
